1           **Innate immune pathways act synergistically to constrain RNA virus**  
2                                   **evolution in *Drosophila melanogaster***

3  
4   **Vanesa Mongelli<sup>1</sup>, Sebastian Lequime<sup>2</sup>, Athanasios Kousathanas<sup>3</sup>, Valérie Gausson<sup>1</sup>,**  
5   **Hervé Blanc<sup>1</sup>, Lluís Quintana-Murci<sup>3,4</sup>, Santiago F. Elena<sup>5,6\*</sup>, Maria-Carla Saleh<sup>1\*</sup>**

6  
7   <sup>1</sup> Viruses and RNA Interference Unit, Institut Pasteur, UMR3569, CNRS, Paris, France.

8   <sup>2</sup> Cluster of Microbial Ecology, Groningen Institute for Evolutionary Life Sciences, University  
9   of Groningen, Groningen, The Netherlands.

10   <sup>3</sup> Human Evolutionary Genetic Unit, Institut Pasteur, UMR2000, CNRS, Paris, France.

11   <sup>4</sup> Human Genomics and Evolution, Collège de France, Paris, France.

12   <sup>5</sup> Instituto de Biología Integrativa de Sistemas (CSIC – Universitat de València), Paterna, 46182  
13   València, Spain.

14   <sup>6</sup> The Santa Fe Institute, Santa Fe NM87501, USA.

15

16   \*email: [santiago.elena@csic.es](mailto:santiago.elena@csic.es) ; [carla.saleh@pasteur.fr](mailto:carla.saleh@pasteur.fr)

17 **Abstract**

18 Host-pathogen interactions impose recurrent selective pressures that lead to constant adaptation  
19 and counter-adaptation in both competing species. Here, we sought to study this evolutionary  
20 arms-race and assessed the impact of the innate immune system on viral population diversity  
21 and evolution, using *D. melanogaster* as model host and its natural pathogen Drosophila C virus  
22 (DCV). We first isogenized eight fly genotypes generating animals defective for RNAi, Imd  
23 and Toll innate immune pathways and also pathogen sensing and gut renewal pathways. Wild-  
24 type or mutant flies were then orally infected and DCV was serially passaged ten times. Viral  
25 population diversity was studied after each viral passage by high-throughput sequencing, and  
26 infection phenotypes were assessed at the beginning and at the end of the passaging scheme.  
27 We found that the absence of any of the various immune pathways studied increased viral  
28 genetic diversity and attenuated the viruses. Strikingly, these effects were observed in both host  
29 factors with antiviral properties and host factors with antibacterial properties. Together, our  
30 results indicate that the innate immunity system as a whole, and not specific antiviral defense  
31 pathways in isolation, generally constrains viral diversity and evolution.

## 32 **Introduction**

33 Interaction between hosts and pathogens trigger defense and counter-defense mechanisms that  
34 often result in reciprocal adaptation and coevolution of both organisms<sup>1</sup>. Empirical evidence of  
35 such arms-race involving both species can be drawn from genome-wide analysis from hosts  
36 and pathogens and in experimental evolution settings. For example, evolutionary analysis of  
37 mammalian genomes have revealed evidence of host-virus coevolution between different  
38 retroviruses and antiviral factors<sup>2,3</sup>, and in plants, host resistance genes and virulence genes  
39 encoded by pathogens have been found to co-evolve<sup>4</sup>. Likewise, between bacteria and their  
40 infecting bacteriophages, experimental co-evolution studies resulted in the occurrence of  
41 genetic variants in both a bacterial lipopolysaccharide synthesis gene and the phage tail fiber  
42 gene which binds to lipopolysaccharide during adsorption<sup>5</sup>. In nematodes and their pathogenic  
43 bacteria, the number of toxin-expressing plasmids varies during adaptation to the host<sup>6</sup>.

44 In insects, analysis of sequences within and between drosophila species showed evidence  
45 of adaptive evolution in immunity related genes<sup>7-10</sup>. In a study using mosquitoes, West Nile  
46 virus, and siRNAs deep sequencing, it was found that the regions of the viral genome more  
47 intensively targeted by the RNA interference (RNAi) mechanism contained a higher number of  
48 mutations than viral genome regions less affected by this pathway, suggesting that this antiviral  
49 defense mechanism imposes a selective pressure to the viral population<sup>11</sup>. Similar observations  
50 on the selective pressure imposed by the RNAi pathway on viral evolution have been done in  
51 plants and human infecting viruses<sup>12-16</sup>. *Drosophila melanogaster* is a well-studied insect  
52 model to decipher virus-host interactions and therefore the impact of the host antiviral immunity  
53 on viral diversity and evolution. Different drosophila immunity pathways and mechanisms are  
54 involved in antiviral defense<sup>17,18</sup>. As is the case for all invertebrates, defense against pathogens  
55 in drosophila relies on innate immunity, which constitutes not only the first, but the exclusive  
56 defense against microbes. Innate immunity is characterized by the recognition of pathogen  
57 derived molecules, called pathogen-associated molecular patterns (PAMPs), by host encoded  
58 receptors (pathogen recognition receptors – PRRs), which leads to a rapid defense response.

59 The RNAi mechanism is known to play a central role in drosophila antiviral defense,  
60 mainly through the action of the small interfering (si) RNA pathway<sup>19-22</sup>. Antiviral RNAi is  
61 triggered by virtually any insect-infecting virus, targeting its genome in a sequence specific  
62 manner to control infection. Several other pathways have antiviral properties in flies, but their  
63 roles in defense against virus seem to be virus specific. The Toll and Imd (Immune deficiency)  
64 pathways, originally described to be involved in antibacterial and antifungal responses, have  
65 been shown to play a role in antiviral defense against *Drosophila C virus* (DCV), Cricket

66 paralysis virus (CrPV), *Drosophila X virus*, *Nora virus*, and *Flock house virus*<sup>23–26</sup>. The Janus  
67 kinase signal transducers and activators of transcription (Jak-STAT) pathway can be activated  
68 upon DCV and CrPV infections in flies, triggering the expression of antiviral factors<sup>27,28</sup>.

69 DCV, a positive sense single stranded RNA virus from the genus *Cripavirus* within the  
70 *Dicistroviridae* family and *Picornavirales* order<sup>29</sup>, is a well characterized natural pathogen of  
71 the fruit fly that can be found in laboratory and wild populations<sup>30</sup>. As for many other  
72 drosophila-infecting viruses, defense against DCV depends on the joint action of different  
73 innate immune pathways and mechanisms. RNAi, Toll and Imd pathways, but also the gene  
74 *Vago*, play a role in the defense against this virus<sup>20,24–27,31–33</sup>. DCV is thought to be acquired by  
75 ingestion in natural conditions<sup>30,34,35</sup>. For orally acquired pathogens, the digestive tract, and the  
76 gut in particular, represents the first host defense barrier. Despite many studies using oral  
77 bacterial infections<sup>36</sup>, the role of gut-specific antiviral responses in drosophila is not fully  
78 understood. Gut triggered responses against bacterial pathogens include the production of  
79 reactive oxygen species (ROS), antimicrobial peptides, and also tissue repair and regeneration  
80 mechanisms. Furthermore, the maintenance of gut homeostasis after tissue damage caused by  
81 pathogenic bacteria relies on the activity of JAK-STAT and epidermal growth factor receptor  
82 (EGFR) pathways, amongst others<sup>37–39</sup>. In the hallmark of viral infections, a role of the Imd and  
83 ERK pathways in the antiviral response in the gut has been suggested<sup>24,40</sup>. It is important to  
84 note that, like many other RNA viruses with error-prone polymerases and fast replication  
85 kinetics, DCV exists as large populations composed of a cloud of genetically related mutant  
86 variants, a phenomenon known as viral quasispecies or mutant swarm<sup>41</sup>. Viral quasispecies  
87 constitute a dynamic repertoire of genetic and phenotypic variability that renders great  
88 adaptability.

89 In this work, we leveraged the vast knowledge on antiviral mechanisms and extensive  
90 genetic tool-box available for *D. melanogaster*, the intrinsic variability of DCV mutant swarm,  
91 and the high depth power of next generation sequencing, to study the impact of innate immunity  
92 pathways on viral diversity and evolution. We aimed to determine not only if each pathway has  
93 a specific impact on the selective pressure imposed to DCV mutant swarms, but also their  
94 relative impact. In addition, we investigated possible links between selected viral variants (viral  
95 function) and specific defense mechanisms. Our results show that the host genotype has an  
96 impact on viral genetic diversity regardless of the immune pathway being affected and this is  
97 accompanied by an increase in survival of infected flies along evolutionary passages. We also  
98 describe complex mutation dynamics, with several examples of clonal interference in which  
99 increases in frequency of adaptive mutations have been displaced by other mutations of stronger

100 effect that arose in different genetic backgrounds. Overall, our results highlight that innate  
101 immunity pathways constrain RNA virus evolution and further demonstrate that antiviral  
102 responses in drosophila are likely polygenic.

## 103 **Results**

### 104 **Production of fly mutant lines for innate immune pathways**

105 To reduce genetic variation due to differences in genetic background, mutant flies defective on  
106 the RNAi, Imd and Toll immunity pathways and also pathogen sensing and gut renewal  
107 mechanism, were isogenized prior to beginning viral evolution studies. Homozygous loss-of-  
108 function lines for Argonaute-2 (*Ago-2<sup>414</sup>*), Dicer-2 (*Dcr-2<sup>L811fsX</sup>* and *Dcr-2<sup>R416X</sup>*), Dorsal-related  
109 immunity factor (*Dif<sup>f</sup>*), Relish (*Rel<sup>E20</sup>*), Spätzle (*spz<sup>2</sup>*), and Vago (*Vago<sup>ΔM10</sup>*) and hippomorphic  
110 mutant line for Epidermal growth factor receptor (*Egfr<sup>41</sup>*) were produced in the same genetic  
111 background by crossing parental lines at least 10 times to *w<sup>1118</sup>* flies. Infection phenotypes of  
112 the newly produced fly lines were characterized by following their survival after inoculation of  
113 DCV by intrathoracic injection (Supplementary Figure 1a). As previously described, *Dcr-2<sup>L811fsX/L811fsX</sup>*,  
114 *Dcr-2<sup>R416X/R416X</sup>* and *Ago-2<sup>414/414</sup>* mutants infected with DCV succumbed faster  
115 than *w<sup>1118</sup>* flies<sup>20,21</sup>, as well as *Vago<sup>ΔM10/ΔM10</sup>* mutants<sup>33</sup>. Toll pathway mutants *spz<sup>2/2</sup>* and *Dif<sup>f/1</sup>*  
116 and Imd pathway mutant *Rel<sup>E20/E20</sup>* were less sensitive to DCV infection than *w<sup>1118</sup>* flies as they  
117 died later than *w<sup>1118</sup>* flies (Supplementary Figure 1a); however, these mutants kept the increased  
118 susceptibility to infection by Gram + and Gram – bacteria respectively (Supplementary Figure  
119 1b and 1c). No difference in virus-induced mortality was found between *w<sup>1118</sup>* and *Egfr<sup>41/41</sup>*  
120 mutant flies (Supplementary Figure 1a). This set of isogenic mutant flies with contrasting  
121 phenotypes to DCV infection provided us with the host model system to perform the  
122 experimental viral evolution assay.

123

### 124 **Experimental DCV evolution**

125 To study the impact of innate immune pathways on virus population diversity and evolution,  
126 DCV was serially passaged in *w<sup>1118</sup>* flies and in the isogenic innate immunity deficient fly lines  
127 (Figure 1a). DCV population diversity was studied after each passage by next generation  
128 sequencing (NGS) and DCV virulence was analyzed at the beginning and at the end of the  
129 evolution experiment.

130 To follow viral infection during the course of the experiment, viral load was determined  
131 by TCID<sub>50</sub> and prevalence (percentage of flies positive for TCID<sub>50</sub>) was calculated for all  
132 passages in individual flies from DCV contaminated cages. We found that for most fly  
133 genotypes and for both biological replicates, 60% or more of the flies became infected with  
134 DCV along the 10 viral passages (Supplementary Figure 2a). When studying viral loads across  
135 passages only *w<sup>1118</sup>*, *Ago-2<sup>414/414</sup>* and *Rel<sup>E20/E20</sup>* fly lines displayed large variability while viral

136 load in the other fly genotypes remained relatively stable along passages (Supplementary Figure  
137 2b).

138 To assess the impact that fly genotype, biological replicate, and viral passage has on  
139 viral loads, the log-transformed TCID<sub>50</sub> values from Supplementary Figure 2b were fitted to  
140 the generalized linear model (GLM) described in the Materials and Methods section. In short,  
141 the model incorporates fly genotype and experimental block as orthogonal factors and passage  
142 as covariable. Highly significant differences were observed on viral load among fly genotypes  
143 (test of the intercept:  $\chi^2 = 146.734$ , 8 d.f.,  $p < 0.001$ ) that were of very large magnitude ( $\eta_p^2 =$   
144 84.85), thus confirming that DCV load strongly varies among host genotypes. A significant  
145 effect was also observed for the viral passages (test of the covariable:  $\chi^2 = 5.075$ , 1 d.f.,  $p =$   
146 0.024), indicating overall differences in viral accumulation among passages, though the  
147 magnitude of this effect was rather small ( $\eta_p^2 = 0.28\%$ ). Regarding second-order interactions  
148 among factors and the covariable, a significant interaction exist between fly genotype and  
149 experimental block ( $\chi^2 = 27.082$ , 8 d.f.,  $p < 0.001$ ) indicating that some of the differences  
150 observed in virus accumulation among host genotypes differed among biological replicates,  
151 and between fly genotype and evolutionary passage ( $\chi^2 = 52.511$ , 8 d.f.,  $p < 0.001$ ). However,  
152 despite being statistically significant, these two effects were of very small magnitude ( $\eta_p^2 =$   
153 2.88% and  $\eta_p^2 = 1.49\%$ , respectively) and likely biologically irrelevant. Likewise, the third-  
154 order interaction was statistically significant ( $\chi^2 = 86.023$ , 8 d.f.,  $p < 0.001$ ), suggesting that the  
155 differences in viral load among experimental blocks observed for a particular host genotype  
156 also depended on the evolutionary passages, although once again the effect could be considered  
157 as minor ( $\eta_p^2 = 1.49\%$ ). Next, we evaluated whether differences exist in viral load between  
158 immune competent ( $w^{1118}$ ) and the different mutant fly genotypes. In all eight cases, DCV  
159 accumulated to significantly higher levels in the immune deficient flies than in the wild-type  
160 ones ( $p < 0.001$ ), with the smallest significant difference corresponding to viral populations  
161 replicating in *Rel<sup>E20/E20</sup>* and *Dif<sup>l/l</sup>* and the largest to those replicating in *Egfr<sup>41/41</sup>* and *Dcr-*  
162 *2<sup>R416X/R416X</sup>* (Supplementary Figure 2c).

163 Overall, these results show that in both immune competent ( $w^{1118}$ ) and immune deficient  
164 flies, DCV oral infection was maintained along passages and confirm that mutant flies are more  
165 permissive to DCV infection.

## 166 **Viral nucleotide diversity differently evolves in each host genotype**

167 To look into the selective pressure imposed by the drosophila innate immune pathways on DCV  
168 population dynamics, we analyzed virus genome diversity after each passage. Half of the  
169 population of infected flies was used to sequence DCV full-length genome by NGS (Figure 1a  
170 and 1b). The viral stocks used to start the experiment, S2 DCV stock and DCV stock, were also  
171 sequenced. Sequencing analysis was performed using the computational pipeline Viral  
172 Variance Analysis (ViVan)<sup>42</sup>. Sequence coverage was at least 8,000 reads per position on the  
173 genome. To determine the error rate of the sequencing procedure, including library preparation,  
174 four sequencing technical replicates from S2 DCV stock were used (Supplementary Figure 3).  
175 A frequency threshold of 0.0028 was used for all subsequent analyses based on variant detection  
176 and frequency correlation between technical replicates (see Methods section).

177 To determine if the lack of activity of a given innate immunity pathway had an impact  
178 on viral population genetic diversity, we calculated the site-averaged nucleotide diversity ( $\pi$ )  
179 on all polymorphic sites ( $n = 1869$ ) across the full-length viral genome, and in the different  
180 DCV genomic regions, present in the full dataset (all passages, including the S2 DCV stock).  
181 We compared the viral nucleotide diversity present in each fly genotype to each other (Table 1  
182 and Supplementary Table 1) and fly genotypes were sorted in four groups according to their  
183 increasing viral nucleotide diversity: group 1 (less diversity):  $w^{1118}$ ,  $Dcr-2^{L811fs/L811fsX}$  and  $Dif^{f/1}$   
184 fly lines; group 2:  $Dif^{f/1}$ ,  $Dcr-2^{L811fs/L811fsX}$ ,  $Rel^{E20/E20}$ ,  $spz^{2/2}$ , and  $Dcr-2^{R416X/R416X}$  fly lines; group  
185 3:  $Dcr-2^{L811fs/L811fsX}$ ,  $Rel^{E20/E20}$ ,  $spz^{2/2}$ ,  $Dcr-2^{R416X/R416X}$ , and  $Ago-2^{414/414}$  fly lines; group 4 (more  
186 diversity): containing  $spz^{2/2}$ ,  $Dcr-2^{R416X/R416X}$ ,  $Ago-2^{414/414}$ ,  $Egfr^{t1/t1}$ , and  $Vago^{\Delta M10/\Delta M10}$  fly lines  
187 (Figure 2, Table 1 and Supplementary Table 1). Next, we analyzed the trajectories of viral  
188 nucleotide diversity along passages and determined if the host genotype, viral passages,  
189 biological replicate, and the interactions between these factors had an impact on the evolution  
190 of diversity (Figure 2 and Table 2). We observed that only the fly genotype had a statistically  
191 significant impact on the differences in  $\pi$  found for each host genotype ( $\chi^2 = 25.545$ , 8 d.f.,  $p =$   
192 0.001) (Table 2).

193 We then wondered if the general differences observed in viral nucleotide diversity,  
194 between fly genotypes, were associated to a particular viral genomic region (*i.e.*, if a determined  
195 viral function was affected during the evolution experiment). To do so, we used the  $\pi$  values on  
196 all polymorphic sites ( $n = 1869$ ) across the full-length viral genome and present in the full  
197 database. Of note, IGR IRES was not included because its lack of genetic variation prevented  
198 us from determining its nucleotide diversity value. Pairwise comparisons of the viral genetic



199 diversity within the genomic regions allowed us to distinguish three main groups: group 1 (less  
200 diversity): 3'UTR; group 2: 5'UTR IRES; and group 3 (more diversity): ORF1 and ORF2  
201 (Table 1 and Supplementary Table 1). We found that the fly genotype had a statistically  
202 significant effect in  $\pi$  ( $\chi^2 = 27.178$ , 8 d.f.,  $p < 0.001$ ), as well as specific viral genomic regions  
203 ( $\chi^2 = 11.698$ , 8 d.f.,  $p = 0.008$ ). As a second-order interaction an effect of the fly genotype and  
204 the biological replicate was found ( $\chi^2 = 16.314$ , 8 d.f.,  $p = 0.038$ ).

205 To determine how the virus evolved from the starting viral stock (S2 DCV stock) in  
206 each fly genotype, viral nucleotide diversity in  $P = 1$ ,  $P = 5$  and  $P = 10$  was subsequently  
207 compared with the diversity in the S2 DCV stock. Pairwise comparison between viral  
208 nucleotide diversity in each fly genotypes in  $P = 1$  versus S2 DCV stock, yield no statistically  
209 significant difference ( $p = 1.000$ ) (Supplementary Table 1). In  $P = 5$  viral diversity was reduced  
210 only in  $w^{1118}$  ( $p = 0.0042$  and  $p = 0.0041$ ),  $Rel^{E20/E20}$  ( $p = 0.0130$  and  $p = 0.0128$ ), and  $Dif^{d/1}$  ( $p$   
211  $= 0.0366$  and  $p = 0.0358$ ) mutants when compared to the starting viral stock (Group 1 – Table  
212 1 and Supplementary Table 1). In  $P = 10$  nucleotide diversity present in all fly genotypes ( $p <$   
213  $0.05$ ), except for  $Dcr-2^{R416X/R416X}$  ( $p = 0.0624$  and  $p = 0.0608$ ) and  $Ago-2^{414/414}$  ( $p = 0.0628$  and  
214  $p = 0.0612$ ) mutant lines, was reduced compared to S2 DCV stock (Group 1 – Table 1 and  
215 Supplementary Table 1). We then performed an ANOVA analysis to test whether biological  
216 replicates and fly genotype could explain the difference in nucleotide diversity of the evolved  
217 strain versus the S2 DCV stock. We found no significant impact on diversity in  $P = 1$  (biological  
218 replicate:  $\chi^2 = 0.0479$ , 10 d.f.,  $p = 0.1313$  and fly genotype:  $\chi^2 = 4.5369$ , 10 d.f.,  $p = 0.3682$ .  
219 However, in both  $P = 5$  and 10, the fly genotype but not the biological replicate was found to  
220 have a significant impact ( $\chi^2 = 7.119$ , 10 d.f.,  $p = 0.002$  and  $\chi^2 = 8.010$ , 10 d.f.,  $p < 0.001$   
221 respectively).

222 These results indicate that viral nucleotide diversity differently evolved in each host  
223 genotype, with coding regions of the virus displaying higher levels of nucleotide diversity than  
224 non-coding regions. They also indicate a general decrease in viral population diversity,  
225 independently of the fly genotype, when compared to the starting viral stock.

226

### 227 **Viral population diversity derives from preexisting standing genetic variation**

228 Next, we examined if the levels of viral diversity observed in DCV populations from innate  
229 immunity mutants compared to the  $w^{1118}$  were accompanied with the fixation of particular  
230 genetic changes in the mutant swarms, and whether (i) these changes can be associated to fitness  
231 effects and (ii) potentially adaptive mutations arose in response to particular immune responses.

232 To do so, we estimated the selection coefficients for each SNPs using their variation in  
233 frequency across evolutionary time (Figure 3 and Supplementary Figure 4), using a classic  
234 population genetics approach<sup>43</sup> (Table 3). Thirty-six SNPs yielded significant estimates of  
235 selection coefficients (this number reduces to 10 if a stricter FDR correction is applied; Table  
236 3). Twenty-one of them were already detected in the ancestral S2 DCV stock, henceforth a  
237 maximum of 15 new SNPs might have arisen during the evolution experiment. Estimated  
238 selection coefficients for all these SNPs ranged between  $-0.304$  per passage (synonymous  
239 mutation RdRp/C5713U) and  $1.204$  per passage (VP2/G6311C nonsynonymous change R16P),  
240 with a median value of  $0.286$  per passage (interquartile rank =  $0.265$ ). Nine mutations were  
241 observed in more than one lineage (range 2 - 7 times), with synonymous mutations  
242 VP3/U7824C appearing in seven lineages of six different host genotypes and mutation  
243 5'UTR/A280U in five lineages of five host genotypes (Table 3). These nine SNPs were all  
244 present in the S2 DCV stock. Indeed, the frequency of SNPs among evolving lineages is  
245 significantly correlated with their frequency in the ancestral S2 DCV stock (Pearson's  $r = 0.401$ ,  
246 36 df,  $p = 0.013$ ), but not with their measured fitness effect ( $r = -0.091$ , 36 df,  $p = 0.588$ ).

247 An interesting question is whether the fitness effects associated to each of these nine  
248 SNPs were the same across all genotypes or, conversely, fitness effects were host genotype-  
249 dependent. To test this hypothesis, we performed one-way ANOVA tests comparing fitness  
250 effects (Table 3) across the corresponding host genotypes. In all cases, significant differences  
251 were observed ( $F \geq 15.637$  and  $p \leq 0.001$ , and  $\geq 93.99\%$  of total observed variance in fitness  
252 effects explained by true genetic differences among host genotypes), supporting the notion that  
253 fitness effects are indeed host-genotype dependent. A pertinent example is the case of the  
254 synonymous mutation VP3/U7824C, which was the most prevalent mutation ( $F_{6,45} = 158.862$ ,  
255  $p < 0.001$ , 99.37% of genetic variance). In this case, a *post hoc* Bonferroni test shows that host  
256 genotypes can be classified into three groups according to the fitness effect of this SNP. In  
257 genotypes  $Dcr-2^{R416X/R416X}$  and  $Rel^{E20/E20}$ , the mutation has a deleterious effect (on average,  
258  $-0.2260$  per passage); in genotypes  $Egfr^{41/t1}$  and  $Vago^{\Delta M10/\Delta M10}$ , the mutation is moderately  
259 beneficial (on average,  $0.1257$  per passage; and in genotypes  $w^{1118}$  and  $Ago-2^{414/414}$ , the  
260 mutation had a strong beneficial effect (on average,  $0.502$  per passage).

261 As shown in Figure 3 and Supplementary Figure 4a, some SNPs show a strong  
262 parallelism in their temporal dynamics, suggesting they might be linked into haplotypes. This  
263 is particularly relevant for mutations shown in Table 5. To test this possibility, we computed  
264 all pairwise Pearson correlation coefficients between mutations' frequencies along evolutionary

265 time. The results of these analyses are shown in Supplementary Figure 4b to 4k as heatmaps.  
266 Again, as an illustrative example, we discuss here the case of the viral population BR2 evolved  
267 in *Ago-2<sup>414/414</sup>* (Supplementary Figure 4d). Synonymous mutations VP3/U7824C and  
268 VP1/C8424U and nonsynonymous mutation VP1/C8227U (H655Y) are all linked into the same  
269 haplotype ( $r \geq 0.998$ ,  $p < 0.001$ ). Since these three mutations already existed in the S2 DCV  
270 stock, it is conceivable that the haplotype already existed and has been selected as a unit. Indeed,  
271 the fitness effects estimated for these three mutations are undistinguishable (one-way ANOVA:  
272  $F_{2,22} = 1.781$ ,  $p = 0.192$ ; average fitness effect  $0.590 \pm 0.032$  per passage) thus suggesting that  
273 the estimated value corresponds to the haplotype as a unit. The absence of this haplotype in  
274 *Ago-2<sup>414/414</sup>* BR1 suggests it was lost during the transmission bottleneck from S2 cells to flies.  
275 Interestingly, mutations VP1/C8424U VP1/C8227U appear also linked into the same haplotype  
276 in population BR2 evolved in *Dcr-2<sup>L811fsXL811fsX</sup>* (Supplementary Figure 4b). These two cases,  
277 as well as populations BR1 evolved in *Rel<sup>E20/E20</sup>*, BR2 evolved in *spz<sup>2/2</sup>* and BR1 and BR2  
278 evolved in *Vago<sup>ΔM10/ΔM10</sup>* illustrate easy to interpret haplotypes (Supplementary Figure 4f, 4e,  
279 4h, and 4i). Other viral populations, especially those evolved in *Egfr<sup>41/41</sup>* flies, show much more  
280 complex patterns (Supplementary Figure 4j and 4k) in which haplotypes change along time by  
281 acquiring *de novo* mutations.

282 When mapping the 36 SNPs found to have significant estimates of selection coefficients  
283 in the viral genome (Figure 4), we found that two mapped to the 5'UTR IRES, twelve to the  
284 ORF1 coding for the non-structural proteins of the virus, one to the viral IGR IRES, 20  
285 mutations were in DCV ORF2 encoding for the viral structural proteins and one mutation  
286 mapped to the 3'UTR. From the nine mutations observed in ORF1, four mapped to the 3C viral  
287 protease and five to the RdRp, and only one of those mutations in the 3C protein was non-  
288 synonymous. From the 20 mutations from ORF2, eight mapped to VP2, five to VP3 and seven  
289 to VP1, the three major DCV predicted capsid proteins.

290 Taken together, these results show that viral population diversity mainly derived from  
291 preexisting standing genetic variation in the ancestral DCV population. Furthermore, temporal  
292 dynamics of population diversity is linked to the fly genotype in which the virus evolved.

293

#### 294 **DCV virulence is not affected by the absence of immune pathways**

295 Finally, we wondered if DCV virulence varied among each lineage in the different fly  
296 genotypes. Infectious DCV stocks were produced from viral passages  $P = 1$  and  $P = 10$  and  
297 from all fly genotypes. Because DCV is not lethal during oral infection<sup>31</sup>, we intrathoracically

298 inoculated  $w^{1118}$  flies with 10 TCID<sub>50</sub> of DCV stocks derived from  $P = 1$  or  $P = 10$  and from  
299 each fly genotype. Survival of the flies was determined daily. We found that  $w^{1118}$  flies were  
300 less sensitive to viral infection when inoculated with DCV stocks derived from  $P = 10$  since  
301 they succumbed later than those inoculated with stocks from  $P = 1$  for most DCV stock origins  
302 (Figure 5a and Supplementary Table 2). Notable exceptions were DCV stocks from BR2 of  
303 *Vago*<sup>ΔM10/ΔM10</sup> mutant flies, for which  $w^{1118}$  flies were more sensitive to  $P = 10$  than to  $P = 1$ ,  
304 and stocks from BR1 of *spz*<sup>2/2</sup> and BR2 of *Egfr*<sup>1/1</sup> mutant flies, for which no difference in  
305 survival after infection with DCV between  $P = 1$  and  $P = 10$  was detected.

306 A fundamental question in evolutionary biology is the role that past evolutionary events  
307 may have in the outcome of evolution<sup>44</sup>. If ongoing evolution is strongly contingent with past  
308 evolutionary events, ancestral phenotypic differences should be retained to some extent, while  
309 if other evolutionary forces such as selection and stochastic events (*i.e.*, mutation and genetic  
310 drift) dominate, then ancestral differences can be eroded and, in the extreme case, even fully  
311 removed. Here, we observed significant differences in the performance of the ancestral DCV  
312 across the eight host genotypes. To test whether these differences are still observable in the  
313 evolved population, we compared the median survival time (Figure 5a and Supplementary  
314 Table 2) for DCV populations isolated at the beginning of the evolution experiment  $P = 1$  and  
315 at the end  $P = 10$  (Figure 5b). Under the null hypothesis of strong historical contingency, it is  
316 expected that data will fit to a regression line of slope 1 and intercepting the ordinate axis at 0.  
317 However, if ancestral differences have been removed, data would fit significantly better to a  
318 regression line with a slope smaller than one and with an intercept greater than zero<sup>44</sup>. Figure  
319 5b shows the data and its fit to the null hypothesis (solid black line) and the alternative  
320 hypothesis (dashed red line). A partial  $F$ -test shows that adding an intercept to the regression  
321 equation significantly improves the fit ( $F_{1,16} = 28.437$ ,  $p < 0.001$ ), thus supporting the notion  
322 that ancestral differences among host genotypes have been removed by the action of subsequent  
323 adaptation, that is, the fixation of beneficial mutations.

## 324 Discussion

325 In this work we aimed at determining the overall impact of innate immunity on viral evolution.  
326 Based on the arms-race hypothesis, we speculated that if a given host defense mechanism  
327 imposes a specific selective pressure on a particular pathogen function, the absence of this  
328 defense mechanism would result in the relaxation of the selective constraint, which would be  
329 in turn detectable in the pathogen at the genomic and phenotypic levels. We found that viral  
330 population diversity evolved differently according to each fly genotype; however, a reduction  
331 of ancestral genetic variation, regardless of the immune pathway affected, was also observed.  
332 Our results indicate that antiviral responses are polygenic; there is not a specific, main immune  
333 defense mechanism against a particular virus, but instead a repertoire of defense mechanisms  
334 that are triggered after infection and that might interact with each other.

335 Our results are compatible with a pervasive presence of clonal interference. In the  
336 absence of sexual reproduction, clonal interference is the process by which beneficial alleles  
337 originated in different clades within a population compete to each other, resulting in one of  
338 them reaching fixation. Subsequently, the outcompeted beneficial allele may appear in the new  
339 dominant genetic background and, assuming no negative epistasis among both loci, become  
340 fixed. As a consequence, beneficial mutations may fix sequentially, thus slowing down the rate  
341 of adaptation<sup>45</sup>. Given their large effective population size and high mutation rates, viral  
342 populations are expected to contain considerable amounts of potentially beneficial standing  
343 variation, making them prone to clonal interference. Indeed, it has been previously shown to  
344 operate in experimental populations of vesicular stomatitis virus adapting to cell cultures<sup>46,47</sup>,  
345 in bacteriophage  $\phi$ X174 populations adapting to harsh saline environments<sup>48</sup>, in tobacco etch  
346 virus adapting to novel plant host species<sup>49</sup>, among HIV-1 escape variants within individual  
347 patients<sup>50</sup>, and also at the epidemiological level among influenza A virus lineages diversifying  
348 antigenically<sup>51</sup>. In our own results, clonal interference can be observed in populations BR1  
349 evolved in *Dcr-2<sup>L811fsX/L811fsX</sup>*, BR1 evolved in *Ago-2<sup>414/414</sup>*, BR1 evolved in *spz<sup>2/2</sup>*, BR2 evolved  
350 in *Rel<sup>E20/E20</sup>*, and BR2 evolved in *Vago<sup>ΔM10/ΔM10</sup>* all share similar patterns in which some  
351 beneficial allele (or haplotypes) rose in frequency, reached a peak at some intermediate passage,  
352 then declined in frequency and were finally outcompeted by a different beneficial mutation (or  
353 haplotype) that had lower initial frequency. For example, the nonsynonymous mutation  
354 VP2/G6931A (A223T) appeared *de novo* in population BR1 evolved in *spz<sup>2/2</sup>*, and outcompeted  
355 several mutations likely linked in a haplotype (Figure 3). Tightly linked to clonal interference  
356 is the concept of leap-frogging<sup>52</sup>, in which the beneficial mutation that ends up dominating the  
357 population is less genetically related to the previously dominant haplotype than to the common

358 ancestor of both (Figure 3). The VP2/G6931A mutation well illustrates this example, as it  
359 appeared in a genetic background that was minoritarian rather than in the dominant one.  
360 Likewise, the mutation VP2/G6311C (R16P), observed in BR1 evolved in *w<sup>1118</sup>* flies, appeared  
361 in a low frequency genetic background different from the most abundant one in previous  
362 passages. Finally, the haplotype containing five different mutations observed in BR2 evolved  
363 in *spz<sup>2/2</sup>* became dominant in frequency after  $P = 6$ , outcompeting two other mutations that were  
364 dominating the population until then.

365 The existence and fixation of haplotypes along our evolution experiment deserves  
366 further discussion. Linked mutations generate three possible interference effects<sup>53</sup>. Firstly, all  
367 mutations might contribute additively, or may be involved in positive epistasis, to the fitness of  
368 the haplotype as a whole, thus increasing its chances to become fixed. Secondly, hitchhiking  
369 and genetic draft may occur, by which deleterious or neutral alleles are driven to fixation along  
370 with a linked beneficial allele. Thirdly, there may be background selection by which the spread  
371 of a beneficial allele is impeded, or at least delayed, owing to the presence of linked deleterious  
372 alleles. For instance, we can hypothesize that haplotype VP3/U7824C-VP1/C8227U-  
373 VP1/C8424U, which swept to fixation in population BR2 evolved in *Ago-2<sup>414/414</sup>*, may represent  
374 a case of genetic draft: two synonymous mutations, potentially neutral, linked to a  
375 nonsynonymous one that may be the actual target of selection. Yet, the lack of infectious clone  
376 for DCV does not allow us to test this hypothesis.

377 Some of the mutations we found to be associated with positive selection coefficients  
378 were synonymous changes (Table 1). However, equating synonymous mutations with neutral  
379 mutations in compacted RNA genomes has proved to be misleading<sup>54,55</sup>. Selection operates at  
380 different levels of a virus' life cycle, and not all these levels necessarily depend on the amino  
381 acid sequence of encoded proteins. For instance, a lack of matching between virus and host  
382 codon usages would slowdown translational speed and efficiency<sup>56</sup>; mutations affecting the  
383 folding of regulatory secondary structures at noncoding regions would affect the interaction  
384 with host and viral factors and thus impact the expression of downstream genes (*e.g.*, mutations  
385 5'UTR/A280U, IGR/A6108G and 3'UTR/U9163A all with significant fitness effects -Table  
386 1)<sup>57</sup>; or evasion from antiviral RNAi defenses by changing the most important relevant sites in  
387 the target of siRNAs<sup>12,13</sup>.

388 It is interesting to observe that viral diversity in mutants for antiviral RNAi, which mode  
389 of action relies on a direct interaction with the viral genome, did not display increased diversity  
390 when compared to mutants from the other immune pathways. One could expect that the release  
391 of the selective pressure that RNAi exerts on the virus genome may allow for the appearance of

392 mutations in the viral suppressor of RNAi. Nonetheless, we did not observed such a change,  
393 possibly because the RNAi suppressor in DCV shares the first 99 amino acids of the RdRp<sup>58,59</sup>  
394 and mutations could affect polymerase activity. The antiviral action of the other immune  
395 pathways remains still unknown and it might even be indirect, with the known role of Imd, Toll,  
396 and Egfr pathways in controlling fly microbiota<sup>37,39</sup> and possibly affecting the prevalence of virus  
397 infections. In this regard, it is important to highlight that the diversity of DCV in the *Dif<sup>d/1</sup>* mutant  
398 (Toll pathway, already described not to have an impact on DCV defense<sup>60</sup>), was  
399 undistinguishable from *w<sup>1118</sup>*, pointing to the specific - although uncharacterized - antiviral  
400 functions of these other immune pathways.

401 Another consideration when interpreting our results is the nature of the viral stock used.  
402 This viral stock has been maintained for years in drosophila S2 cells. The observation that viral  
403 population diversity decreased along passages in the fly, highlights the strength of the selection  
404 forces that constrain the virus to adapt to a new environment. During the successive passages,  
405 in the absence of a given immune response, the capacity of the virus to evolve will be  
406 determined by a combination of two factors: the adaptation to the new environment (constrain)  
407 and the lack of immune response (relaxation). Because DCV replication is significantly  
408 increased in all immune deficient mutants, the potential for population diversification is higher.  
409 This effect is clearly observed in *w<sup>1118</sup>* flies where the virus is “only” adapting to the new  
410 environment and DCV populations evolved in *w<sup>1118</sup>* flies show less variation than all other  
411 lineages. Future experimental evolution studies using viral stocks derived from flies, instead of  
412 cell cultures, are warranted to address this topic.

413 In a parallel study published in this issue, Navarro *et al.* used *Arabidopsis thaliana* and  
414 turnip mosaic virus (TuMV) to carry out experimental virus evolution assays with a similar  
415 design to ours. In their work, the authors used plant mutants compromised in their antiviral  
416 response (more permissive to viral infection) or with an enhanced antiviral response (less  
417 permissive to viral infection) and allow the virus to evolve for 12 passages. Similarly to what  
418 we found in the *Drosophila melanogaster* - DCV system, the authors showed that viral  
419 population evolutions dynamics, as well as viral loads, depend on host genotype. Interestingly,  
420 a reduction of ancestral genetic variation regardless of the immune pathway affected was also  
421 clearly observed, in agreement with our observations.

422 Taken together, these two studies point to the concerted action of the different immune  
423 pathways to limit viral evolution. Response to infection does not simply consist of activating  
424 immune pathways, it also encompasses a broad range of physiological consequences including  
425 metabolic adaptations, stress responses and tissue repair. Critically, upon infection, the

426 homeostatic regulation of these pathways is altered. However, such alterations do not always  
427 result in increased disease severity or acute infections and can also lead to improved survival  
428 (or health) despite active virus replication, which defines tolerance. The *Drosophila*-DCV arm  
429 race seems to be a perfect example of tolerance, and evolution during tolerance remains a field  
430 that needs to be studied and described in further detail.



## 431 **Materials and Methods**

### 432 **Fly strains and husbandry**

433 Flies were maintained on a standard cornmeal diet (Bloomington) at a constant temperature of  
434 25 °C. All fly lines were cleaned of possible chronic infections (viruses and Wolbachia) as  
435 described previously<sup>61</sup>. The presence or absence of these chronic infections was determined by  
436 RT-PCR with specific primers for Nora virus, *Drosophila A virus*, DCV (NoraVfor  
437 ATGGCGCCAGTTAGTGCAGACCT, NoraVrev CCTGTTGTTCCAGTTGGGTTCGA  
438 DAVfor AGAGTGGCTGTGAGGCAGAT, DAVrev GCCATCTGACAACAGCTTGA,  
439 DCVfor GTTGCCTTATCTGCTCTG, DCVrev CGCATAACCATGCTCTTCTG) and by  
440 PCR with specific primers *Wolbachia sp* (wspfor TGGTCCAATAAGTGATGAAGAAAC,  
441 wsprev AAAAATTAACGCTACTCCA and wspBfor TTTGCAAGTGAAACAGAAGG,  
442 wspBrev GCTTTGCTGGCAAAATGG).

443 Fly mutant lines for *Dcr-2<sup>L811fsX</sup>* and *Dcr-2<sup>R416X</sup>*<sup>62</sup>, *Ago-2<sup>414</sup>*<sup>63</sup>, *Spz<sup>2</sup>*<sup>64</sup>, *Dif<sup>1</sup>*<sup>65</sup>, *Rel<sup>E20</sup>*<sup>66</sup>,  
444 *Vago<sup>ΔM10</sup>*<sup>33</sup> and *Egfr<sup>Δ1</sup>*<sup>67</sup> were isogenized to *w<sup>1118</sup>* fly line genetic background first by replacing  
445 the chromosomes not containing the mutation using balancer chromosomes and then by  
446 recombination by backcrossing at least ten times to *w<sup>1118</sup>* line. The presence of the mutation  
447 was followed during and at the end of the backcrossing procedure by PCR using specific  
448 primers (Dcr2811\_3001for TTTGACCCATGACTTTGCGGT, Dcr2811\_3294rev  
449 CCTTGCAGAGATGCCCTGTT, Dcr2416\_4341for GATTGGCATTACCGTCCCGAA,  
450 Dcr2416\_4670rev AGCGATTCCTG ATGAGTCTTA, Ago2414\_rev  
451 TTGTGGATGGCTGTTGTCTCG, Ago251B414\_for AGAGTCCCCACTTGAATGGCC,  
452 Spz2\_for GCCTTTGGCGCTTGCCTAATT, Spz2\_rev GTCCTGCAAAGGAATCGCTC,  
453 Dif1\_for CTTGGCAATCTTCTCGCACAG, Dif1\_rev ATCGTGGTCTCCTGTGTGACG,  
454 Rel\_Ex4rev AGCTCTCCAGTTTGTGCCGAC, Rel-RD\_5'UTRfor  
455 CTGGCGTTAGTTTCGGCGTTG, Vagod10\_for TTGGCCAACGGAAAGGATGTG,  
456 Vagod10\_rev TGCCACCGATGATCAATGACA, Egfrt1\_for  
457 CAAAGCTCGAACCGAAATTA, Egfrt1\_rev CTTTCTTAACGTCCACATGA).

458

### 459 **Virus production and titration**

460 S2 DCV stock used to start the experiment was prepared in S2 cells. Cells were maintained in  
461 Schneider culture medium and at 25 °C and the appearance of the cells was observed daily.  
462 Cells were harvest after when cytopathic effect was detected. The cells were frozen at -80 °C,  
463 thawed on ice and centrifuged for 15 min at 15,000 g at 4 °C. The supernatant was recovered,

464 aliquoted and stored at  $-80^{\circ}\text{C}$ . Stocks were titred in S2 cells and titres were measured using  
465 the end-point dilution method and expressed as  $\text{TCID}_{50}$ .

466 To produce the DCV stocks from passages  $P = 1$  and  $P = 10$  from the evolution  
467 experiment half of the population of flies infected with DCV from fly genotype (approx. 250  
468 flies) was homogenized in  $1\times$  PBS, homogenates were frozen at  $-80^{\circ}\text{C}$ , then thawed on ice,  
469 centrifuged to discard the tissue debris, supernatant was recovered and filtered to discard  
470 bacteria contamination, then aliquoted and stored at  $-80^{\circ}\text{C}$ . Stocks were titred in S2 cells and  
471 titres were measured using the end-point dilution method and expressed as  $\text{TCID}_{50}$ .

472

### 473 **Viral infections and bacterial infections and survival analysis**

474 To do DCV infections by intrathoracic inoculation, 4 to 5 days old female flies were injected  
475 with a Nanoject II apparatus (DrummondScientific) with 50 nl of a viral suspension in 10 mM  
476 Tris buffer, pH 7. An injection of the same volume of 10 mM Tris, pH 7 served as a mock-  
477 infected control. Infected flies were kept at  $25^{\circ}\text{C}$ , transferred into fresh vials every 2 days and  
478 number of dead flies was scored daily. For the bacterial infections, 4 to 5 days old female flies  
479 were intrathoracically injected using a Nanoject II apparatus (DrummondScientific) with 50 nl  
480 of the bacterial suspension in  $1\times$  PBS buffer, pH 7. An injection of the same volume of  $1\times$  PBS  
481 buffer served as a mock-infected control. Infected flies were kept at  $29^{\circ}\text{C}$ , transferred into fresh  
482 vials every 2 days and number of dead flies was scored daily.

483

### 484 **Virus experimental evolution**

485 To produce the starting DCV stock (DCV stock) 5 to 6 days old  $w^{1118}$  were intrathoracically  
486 injected with 100  $\text{TCID}_{50}$  of DCV from a stock produced in S2 drosophila cells (S2 DCV stock)  
487 or mock infected. At 4 dpi,  $N = 90$  DCV infected flies were placed in cages containing fresh  
488 medium, left during 3 days and then removed to place in this DCV contaminated or mock  
489 contaminated cages  $N = 500$  5 to 6 days old wild type or mutant flies (males and females). Flies  
490 were allowed to feed ad libitum during 3 days (oral inoculation period), then moved to a clean  
491 cage for 1 day, and further placed into a new clean cage and left during 4 days, when they were  
492 harvest (DCV  $P = 1$ ). Contaminated cages were after used to place a new group of flies. This  
493 procedure was repeated 10 times (10 DCV Passages,  $P = 1$  to  $P = 10$ ) and replicated twice  
494 (biological replicates BR1 and BR2).

495 For statistical analyses,  $\text{TCID}_{50}$  data were transformed as  $T = \log(\text{TCID}_{50} + 1)$  and then  
496 fitted to a generalized linear model in which fly genotype ( $G$ ) and BR ( $B$ ) were treated as  
497 orthogonal factors.  $G$  was considered as a fixed effects factor whereas  $B$  was considered as a

498 random effects factor. Evolutionary passage ( $P$ ) was introduced in the model as a fixed effects  
499 covariable. We also considered second and third order interactions between the two factors and  
500 the covariable. The model equation thus reads:

$$501 T_{ijk}(P) \sim \tau + P + G_i + B_j + (P \times G)_i + (P \times B)_j + (G \times B)_{ij} + (P \times G \times B)_{ij} + \varepsilon_{ijk}.$$

502 Where  $T_{ijk}(P)$  is the transformed TCID<sub>50</sub> observed for a particular titration assay  $k$  of BR  $j$  of  
503 fly genotype  $i$ ,  $\tau$  represents the grand mean value and  $\varepsilon_{ijk}$  stands for the error assumed to be  
504 Gaussian distributed at every  $P$ . The significance of each term in the model was evaluated using  
505 a likelihood ratio test that follows a  $\chi^2$  probability distribution. The magnitude of the effects  
506 was evaluated using the  $\eta_p^2$  statistic (proportion of total variability in the traits vector  
507 attributable to each factor in the model; conventionally, values of  $\eta_p^2 \geq 0.15$  are considered as  
508 large effects). These analyses were done using SPSS version 27 (IBM, Armonk, NY).

509

### 510 **RNA extraction, cDNA synthesis and NGS library production**

511 Extraction of RNA from DCV from all passages of the evolution experiment was done using  
512 half of the population of infected flies from each fly genotype (approx. 250 flies). The flies  
513 were homogenized in Trizol and the manufacturer's instructions were followed. Total RNA  
514 concentration was determined using NanoDrop ND-1000 Spectrophotometer and 300 ng of  
515 total RNA were used to produce the cDNA using oligo(dT) as primers to retro-transcription  
516 and the Maxima H Minus Reverse Transcriptase Kit, following the manufacturer's instructions.  
517 The cDNA obtained was used as template to amplify the full-length genome of DCV with  
518 specific primers (DCVfor ATATGTACACACGGCTTTTAGGT and DCVrev  
519 CAGTAAGCAGGAAAATTGCG). The PCR products were gel purified and their  
520 concentration determined using NanoDrop ND-1000 Spectrophotometer. 200 ng of the purified  
521 PCR product were used to produce the NGS library using NEBNext UltraII DNA Library Prep  
522 Kit for Illumina and following the manufacturer's instructions.

523 Sequencing of DCV populations from *Dif<sup>d/1</sup>* mutant flies from  $P = 4$  and  $P = 6$  from  
524 BR1 and  $P = 8$  from BR2 did not work.

525

### 526 **Genetic diversity analyses**

527 **Variant frequency threshold.** To determine the error rate of the sequencing procedure,  
528 including library preparation, four sequencing technical replicates from S2 DCV stock were  
529 used (Supplementary Figure 3a). First, pairwise comparison was done to identify the variant  
530 frequency threshold above which at least 95% of the variants were detected in both considered

531 replicates (highest detection threshold = 0.0028). All variants above detection threshold were  
532 then correlated between each technical replicate to ensure good correlation between reported  
533 frequency values: the Pearson correlation coefficient between the detected frequency for  
534 variants was  $r \geq 0.982$  for all pairwise correlation ( $p < 2.2 \times 10^{-16}$ ). The R package used for the  
535 analysis has been described elsewhere<sup>68-71</sup>.

536

537 **Nucleotide diversity ( $\pi$ ).** Nucleotide diversity of the viral population was computed using the  
538 following formula<sup>72</sup>:

539 
$$\pi = \frac{D}{D-1} \{1 - [p^2 + (1-p)^2]\}$$

540 with  $D$ , the sequencing depth and  $p$  the frequency of the minority variant at each nucleotide  
541 site. For diallelic SNV,  $\pi$  ranges from 0 to 0.5 (both alleles at equal frequency). In the  
542 subsequent analyses,  $\pi$  was averaged over all polymorphic nucleotide sites of the DCV genome  
543 of each sample<sup>73</sup>. A site was considered polymorphic if at least one sample showed the presence  
544 of a nucleotide variant at said position of the DCV genome. Log<sub>10</sub>-transformed site-averaged  $\pi$   
545 values were then compared between fly genotypes (orthogonal factor), biological replicates  
546 (orthogonal factor), passages (continuous variable) and genomic regions (orthogonal factor)  
547 and their interactions using a generalized linear model. The significance of each term in the  
548 model was evaluated using a likelihood ratio test that follows a  $\chi^2$  probability distribution.

549

550 **Estimation of relative mutational fitness effects.** We have followed the classic population  
551 genetics method described in Hartl and Clark (1989)<sup>43</sup>. In short, lets  $x_l(t)$  be the frequency of a  
552 mutant allele (SNP) at genomic position  $l$  and passage  $t$  and, therefore,  $1 - x_l(t)$  the frequency  
553 of the wild-type allele. It holds that  $\log \frac{x_l(t)}{1-x_l(t)} = \log \frac{x_l(0)}{1-x_l(0)} + t \log(1 - s_l)$ , where  $s_l$  is the  
554 selection coefficient of the mutant relative to the wild-type allele at locus  $l$ . Selection  
555 coefficients calculated this way have units of inverse time (per passage in our case). This  
556 equation was fitted to the time series data of each locus  $l$  shown in Figure 3 by least squares  
557 regression, obtaining an estimate of  $s_l$  and its standard error (SEM).

558 Haplotype inference was done using two different statistical approaches. First, by  
559 assessing the similarity between temporal dynamics of all possible pairs of loci. To this end,  
560 Pearson partial correlation coefficients (controlling for passages) were computed and their  
561 significance level corrected for multiple tests of the same null hypothesis using Benjamini and  
562 Hochberg (1995)<sup>74</sup> false discovery rate (FDR) method. Correlation coefficient matrices were

563 visualized as heatmaps in which more similar alleles were clustered together. Second, we  
564 confirmed the results from the first method using the longitudinal variant allele frequency  
565 factorization problem (LVAFP) method as implemented in CALDER<sup>75</sup>. LVAFP generates  
566 spanning trees of a directed graph constructed from the variant allele frequencies. The output  
567 of CALDER was used as input of TimeScape<sup>76</sup> to generate the Muller plots that illustrate the  
568 ancestry of mutations and haplotypes along the evolution experiment (Figure 3).

569 Statistical analyses described in this section have been done with R version 4.0.2 in  
570 RStudio version 1.3.1073. Scripts are provided in Supplementary File S1.

571 **References**

- 572 1. Morgan, A. D. & Koskella, B. Coevolution of Host and Pathogen. in *Genetics and*  
573 *Evolution of Infectious Diseases* 115–140 (Elsevier, 2017). doi:10.1016/B978-0-12-799942-  
574 5.00006-8.
- 575 2. Daugherty, M. D. & Malik, H. S. Rules of Engagement: Molecular Insights from Host-  
576 Virus Arms Races. *Annu. Rev. Genet.* **46**, 677–700 (2012).
- 577 3. Barreiro, L. B. From evolutionary genetics to human immunology: how selection shapes  
578 host defence genes. *G E N E T i C S* **14**.
- 579 4. Thompson, J. N. & Burdon, J. J. Gene-for-gene coevolution between plants and  
580 parasites. **360**, 5 (1992).
- 581 5. Buckling, A. & Rainey, P. B. Antagonistic coevolution between a bacterium and a  
582 bacteriophage. **6** (2002).
- 583 6. Masri, L. *et al.* Host–Pathogen Coevolution: The Selective Advantage of *Bacillus*  
584 *thuringiensis* Virulence and Its Cry Toxin Genes. *PLOS Biol.* **13**, e1002169 (2015).
- 585 7. Obbard, D. J., Gordon, K. H. J., Buck, A. H. & Jiggins, F. M. The evolution of RNAi  
586 as a defence against viruses and transposable elements. *Philos. Trans. R. Soc. B Biol. Sci.* **364**,  
587 99–115 (2009).
- 588 8. Lazzaro, B. P. Natural selection on the *Drosophila* antimicrobial immune system. *Curr.*  
589 *Opin. Microbiol.* **11**, 284–289 (2008).
- 590 9. Lazzaro, B. P. Molecular Population Genetics of Inducible Antibacterial Peptide Genes  
591 in *Drosophila melanogaster*. *Mol. Biol. Evol.* **20**, 914–923 (2003).
- 592 10. Sackton, T. B. *et al.* Dynamic evolution of the innate immune system in *Drosophila*.  
593 *Nat. Genet.* **39**, 1461–1468 (2007).
- 594 11. Brackney, D. E., Beane, J. E. & Ebel, G. D. RNAi Targeting of West Nile Virus in  
595 Mosquito Midguts Promotes Virus Diversification. *PLoS Pathog.* **5**, 9 (2009).
- 596 12. Lin, S.-S. *et al.* Molecular Evolution of a Viral Non-Coding Sequence under the  
597 Selective Pressure of amiRNA-Mediated Silencing. *PLoS Pathog.* **5**, e1000312 (2009).
- 598 13. Lafforgue, G. *et al.* Tempo and Mode of Plant RNA Virus Escape from RNA  
599 Interference-Mediated Resistance. *J. Virol.* **85**, 9686–9695 (2011).
- 600 14. Martínez, F. *et al.* Ultradeep sequencing analysis of population dynamics of virus escape  
601 mutants in RNAi-mediated resistant plants. *Mol. Biol. Evol.* **29**, 3297–3307 (2012).
- 602 15. Das, A. T. *et al.* Human Immunodeficiency Virus Type 1 Escapes from RNA  
603 Interference-Mediated Inhibition. *J. Virol.* **78**, 2601–2605 (2004).
- 604 16. Gitlin, L., Stone, J. K. & Andino, R. Poliovirus Escape from RNA Interference: Short

- 605 Interfering RNA-Target Recognition and Implications for Therapeutic Approaches. *J. Virol.*  
606 **79**, 1027–1035 (2005).
- 607 17. Mondotte, J. A. & Saleh, M.-C. Antiviral Immune Response and the Route of Infection  
608 in *Drosophila melanogaster*. in *Advances in Virus Research* vol. 100 247–278 (Elsevier, 2018).
- 609 18. Swevers, L., Liu, J. & Smaghe, G. Defense Mechanisms against Viral Infection in  
610 *Drosophila*: RNAi and Non-RNAi. *Viruses* **10**, 230 (2018).
- 611 19. Galiana-Arnoux, D., Dostert, C., Schneemann, A., Hoffmann, J. A. & Imler, J.-L.  
612 Essential function in vivo for Dicer-2 in host defense against RNA viruses in *drosophila*. *Nat.*  
613 *Immunol.* **7**, 590–597 (2006).
- 614 20. van Rij, R. P. *et al.* The RNA silencing endonuclease Argonaute 2 mediates specific  
615 antiviral immunity in *Drosophila melanogaster*. *Genes Dev.* **20**, 2985–2995 (2006).
- 616 21. Wang, X.-H. *et al.* RNA Interference Directs Innate Immunity Against Viruses in Adult  
617 *Drosophila*. *Science* **312**, 452–454 (2006).
- 618 22. Zambon, R. A., Vakharia, V. N. & Wu, L. P. RNAi is an antiviral immune response  
619 against a dsRNA virus in *Drosophila melanogaster*. *Cell. Microbiol.* **8**, 880–889 (2006).
- 620 23. Costa, A., Jan, E., Sarnow, P. & Schneider, D. The Imd Pathway Is Involved in Antiviral  
621 Immune Responses in *Drosophila*. *PLoS ONE* **4**, e7436 (2009).
- 622 24. Sansone, C. L. *et al.* Microbiota-Dependent Priming of Antiviral Intestinal Immunity in  
623 *Drosophila*. *Cell Host Microbe* **18**, 571–581 (2015).
- 624 25. Ferreira, Á. G. *et al.* The Toll-Dorsal Pathway Is Required for Resistance to Viral Oral  
625 Infection in *Drosophila*. *PLoS Pathog.* **10**, e1004507 (2014).
- 626 26. Zambon, R. A., Nandakumar, M., Vakharia, V. N. & Wu, L. P. The Toll pathway is  
627 important for an antiviral response in *Drosophila*. *Proc. Natl. Acad. Sci.* **102**, 7257–7262  
628 (2005).
- 629 27. Dostert, C. *et al.* The Jak-STAT signaling pathway is required but not sufficient for the  
630 antiviral response of *drosophila*. *Nat. Immunol.* **6**, 946–953 (2005).
- 631 28. Merklings, S. H. *et al.* The Epigenetic Regulator G9a Mediates Tolerance to RNA Virus  
632 Infection in *Drosophila*. *PLoS Pathog.* **11**, e1004692 (2015).
- 633 29. Christian, P. D. & Johnson, K. N. The novel genome organization of the insect picorna-  
634 like virus *Drosophila C virus* suggests this virus belongs to a previously undescribed virus  
635 family. *J. Gen. Virol.* **79**, 191–203 (1998).
- 636 30. Jousset, F. X. & Plus, N. [Study of the vertical transmission and horizontal transmission  
637 of ‘*Drosophila melanogaster*’ and ‘*Drosophila immigrans*’ picornavirus (author’s transl)]. *Ann.*  
638 *Microbiol. (Paris)* **126**, 231–249 (1975).

- 639 31. Mondotte, J. A. *et al.* Immune priming and clearance of orally acquired RNA viruses in  
640 *Drosophila*. *Nat. Microbiol.* **3**, 1394–1403 (2018).
- 641 32. Torri, A., Mongelli, V., Mondotte, J. A. & Saleh, M.-C. Viral Infection and Stress Affect  
642 Protein Levels of Dicer 2 and Argonaute 2 in *Drosophila melanogaster*. *Front. Immunol.* **11**,  
643 362 (2020).
- 644 33. Deddouche, S. *et al.* The DExD/H-box helicase Dicer-2 mediates the induction of  
645 antiviral activity in *drosophila*. *Nat. Immunol.* **9**, 1425–1432 (2008).
- 646 34. Gomariz-Zilber, E., Jeune, B. & Thomas-Orillard, M. Limiting conditions of the  
647 horizontal transmission of the *Drosophila C* virus in its host (*D. melanogaster*). *Acta Oecologica*  
648 **19**, 125–137 (1998).
- 649 35. Stevanovic, A. L. & Johnson, K. N. Infectivity of *Drosophila C* virus following oral  
650 delivery in *Drosophila* larvae. *J. Gen. Virol.* **96**, 1490–1496 (2015).
- 651 36. Royet, J. Epithelial homeostasis and the underlying molecular mechanisms in the gut of  
652 the insect model *Drosophila melanogaster*. *Cell. Mol. Life Sci.* **68**, 3651–3660 (2011).
- 653 37. Buchon, N., Broderick, N. A., Chakrabarti, S. & Lemaitre, B. Invasive and indigenous  
654 microbiota impact intestinal stem cell activity through multiple pathways in *Drosophila*. *Genes*  
655 *Dev.* **23**, 2333–2344 (2009).
- 656 38. Buchon, N., Broderick, N. A., Poidevin, M., Pradervand, S. & Lemaitre, B. *Drosophila*  
657 Intestinal Response to Bacterial Infection: Activation of Host Defense and Stem Cell  
658 Proliferation. *Cell Host Microbe* **5**, 200–211 (2009).
- 659 39. Buchon, N., Broderick, N. A., Kuraishi, T. & Lemaitre, B. *Drosophila* EGFR pathway  
660 coordinates stem cell proliferation and gut remodeling following infection. *BMC Biol.* **8**, 152  
661 (2010).
- 662 40. Xu, J. *et al.* ERK signaling couples nutrient status to antiviral defense in the insect gut.  
663 *Proc. Natl. Acad. Sci.* **110**, 15025–15030 (2013).
- 664 41. Lauring, A. S. & Andino, R. Quasispecies Theory and the Behavior of RNA Viruses.  
665 *PLoS Pathog.* **6**, e1001005 (2010).
- 666 42. Isakov, O. *et al.* Deep sequencing analysis of viral infection and evolution allows rapid  
667 and detailed characterization of viral mutant spectrum. 10.
- 668 43. Hartl, D. L. & Clark, A. G. Principles of Population Genetics, Fourth Edition. 7.
- 669 44. Travisano, M., Mongold, J. A., Bennett, A. F. & Lenski, R. E. Experimental Tests of  
670 the Roles of Adaptation, Chance, and History in Evolution. **267**, 5 (1995).
- 671 45. Desai, M. M. & Fisher, D. S. Beneficial Mutation–Selection Balance and the Effect of  
672 Linkage on Positive Selection. *Genetics* **176**, 1759–1798 (2007).



- 673 46. Miralles, R. Clonal Interference and the Evolution of RNA Viruses. *Science* **285**, 1745–  
674 1747 (1999).
- 675 47. Miralles, R., Moya, A. & Elena, S. F. Diminishing Returns of Population Size in the  
676 Rate of RNA Virus Adaptation. *J. Virol.* **74**, 3566–3571 (2000).
- 677 48. Pepin, K. M. & Wichman, H. A. Experimental evolution and genome sequencing reveal  
678 variation in levels of clonal interference in large populations of bacteriophage  $\phi$ X174. *BMC*  
679 *Evol. Biol.* **8**, 85 (2008).
- 680 49. Navarro R, Ambrós S, Martínez F, Elena SF. 2017. Diminishing returns of inoculum  
681 size on the rate of a plant RNA virus evolution. *Eurphys Lett.* 120:38001. (2017).
- 682 50. Pandit, A. & de Boer, R. J. Reliable reconstruction of HIV-1 whole genome haplotypes  
683 reveals clonal interference and genetic hitchhiking among immune escape variants.  
684 *Retrovirology* **11**, 56 (2014).
- 685 51. Strelkowa, N. & Lässig, M. Clonal Interference in the Evolution of Influenza. *Genetics*  
686 **192**, 671–682 (2012).
- 687 52. Gerrish, P. J. & Lenski, R. E. The fate of competing beneficial mutations in an asexual  
688 population. in *Mutation and Evolution* (eds. Woodruff, R. C. & Thompson, J. N.) vol. 7 127–  
689 144 (Springer Netherlands, 1998).
- 690 53. Held, T., Klemmer, D. & Lässig, M. Survival of the simplest in microbial evolution.  
691 *Nat. Commun.* **10**, 2472 (2019).
- 692 54. Novella, I. S., Zárata, S., Metzgar, D. & Ebendick-Corpus, B. E. Positive Selection of  
693 Synonymous Mutations in Vesicular Stomatitis Virus. *J. Mol. Biol.* **342**, 1415–1421 (2004).
- 694 55. Zanini, F. & Neher, R. A. Quantifying Selection against Synonymous Mutations in  
695 HIV-1 env Evolution. *J. Virol.* **87**, 11843–11850 (2013).
- 696 56. Martínez, M. A., Jordan-Paiz, A., Franco, S. & Nevot, M. Synonymous Virus Genome  
697 Recoding as a Tool to Impact Viral Fitness. *Trends Microbiol.* **24**, 134–147 (2016).
- 698 57. Kieft, J. S., Zhou, K., Jubin, R. & Doudna, J. A. Mechanism of ribosome recruitment  
699 by hepatitis C IRES RNA. *RNA* **7**, 194–206 (2001).
- 700 58. van Rij, R. P. *et al.* The RNA silencing endonuclease Argonaute 2 mediates specific  
701 antiviral immunity in *Drosophila melanogaster*. *Genes Dev.* **20**, 2985–2995 (2006).
- 702 59. Zhang, L. *et al.* lncRNA Sensing of a Viral Suppressor of RNAi Activates Non-  
703 canonical Innate Immune Signaling in *Drosophila*. *Cell Host Microbe* **27**, 115-128.e8 (2020).
- 704 60. Ferreira, Á. G. *et al.* The Toll-Dorsal Pathway Is Required for Resistance to Viral Oral  
705 Infection in *Drosophila*. *PLoS Pathog.* **10**, e1004507 (2014).
- 706 61. Merklings, S. H. & van Rij, R. P. Analysis of resistance and tolerance to virus infection

- 707 in *Drosophila*. *Nat. Protoc.* **10**, 1084–1097 (2015).
- 708 62. Lee, Y. S. *et al.* Distinct Roles for *Drosophila* Dicer-1 and Dicer-2 in the siRNA/miRNA  
709 Silencing Pathways. *Cell* **117**, 69–81 (2004).
- 710 63. Okamura, K. Distinct roles for Argonaute proteins in small RNA-directed RNA  
711 cleavage pathways. *Genes Dev.* **18**, 1655–1666 (2004).
- 712 64. Levashina, E. A., Ohresser, S., Lemaitre, B. & Imler, J. L. Two distinct pathways can  
713 control expression of the gene encoding the *Drosophila* antimicrobial peptide metchnikowin. *J.*  
714 *Mol. Biol.* **278**, 515–527 (1998).
- 715 65. Rutschmann, S. *et al.* The Rel Protein DIF Mediates the Antifungal but Not the  
716 Antibacterial Host Defense in *Drosophila*. *Immunity* **12**, 569–580 (2000).
- 717 66. Hedengren, M. *et al.* Relish, a Central Factor in the Control of Humoral but Not Cellular  
718 Immunity in *Drosophila*. *Mol. Cell* **4**, 827–837 (1999).
- 719 67. Díaz-Benjumea, F. J. & García-Bellido, A. Behaviour of cells mutant for an EGF  
720 receptor homologue of *Drosophila* in genetic mosaics. *Proc. Biol. Sci.* **242**, 36–44 (1990).
- 721 68. Hothorn, T., Bretz, F. & Westfall, P. Simultaneous Inference in General Parametric  
722 Models. *Biom. J.* **50**, 346–363 (2008).
- 723 69. Weisberg S, F. J. An R Companion to Applied Regression, Third edition. Sage,  
724 Thousand Oaks CA. <https://socialsciences.mcmaster.ca/jfox/Books/Companion/>. in (2019).
- 725 70. Lenth. *Estimated Marginal Means, aka Least-Squares Means. R package version 1.5.5.*  
726 (2021).
- 727 71. Wickham, H. *et al.* Welcome to the Tidyverse. *J. Open Source Softw.* **4**, 1686 (2019).
- 728 72. Cornman, R. S. *et al.* Population-genomic variation within RNA viruses of the Western  
729 honey bee, *Apis mellifera*, inferred from deep sequencing. *BMC Genomics* **14**, 154 (2013).
- 730 73. Lequime, S., Fontaine, A., Ar Gouilh, M., Moltini-Conclois, I. & Lambrechts, L.  
731 Genetic Drift, Purifying Selection and Vector Genotype Shape Dengue Virus Intra-host Genetic  
732 Diversity in Mosquitoes. *PLOS Genet.* **12**, e1006111 (2016).
- 733 74. Benjamini, Y. & Hochberg, Y. Controlling the False Discovery Rate: A Practical and  
734 Powerful Approach to Multiple Testing. *J. R. Stat. Soc. Ser. B Methodol.* **57**, 289–300 (1995).
- 735 75. Myers, M. A., Satas, G. & Raphael, B. J. CALDER: Inferring Phylogenetic Trees from  
736 Longitudinal Tumor Samples. *Cell Syst.* **8**, 514–522.e5 (2019).
- 737 76. Smith, M. A. *et al.* E-scape: interactive visualization of single-cell phylogenetics and  
738 cancer evolution. *Nat. Methods* **14**, 549–550 (2017).

739

## 740 **Acknowledgements**

741 We thank members of the Saleh Lab and M. Vignuzzi for fruitful discussions. We thank C.  
742 Meignin for *Rel<sup>E20</sup>* and *Vago<sup>ΔM10</sup>* flies. This work was supported by the European Research  
743 Council (FP7/2013–2019 ERC CoG 615220) and the French Government’s Investissement  
744 d’Avenir program, Laboratoire d’Excellence Integrative Biology of Emerging Infectious  
745 Diseases (grant ANR-10-LABX-62-IBEID) to M.-C.S. Work in S.F.E.’s laboratory was  
746 supported by grants BFU2015-65037-P and PID2019-103998GB-I00 (Spain Agencia Estatal  
747 de Investigación - FEDER) and PROMETEU2019/012 (Generalitat Valenciana).

748

#### 749 **Author contributions**

750 V.M. and M.-C.S. conceived the study, and V.M., M.-C.S., A.K. and L.Q.M. established the  
751 experimental design. V.M., V.G., and H.B. performed the investigations. S.L. and S.F.E.  
752 performed the formal analyses. V.M., S.F.E. and M.-C.S. wrote the paper and acquired funding.

753

#### 754 **Competing interests**

755 The authors declare no competing interests.

756

757 **Materials & Correspondence:** carla.saleh@pasteur.fr to whom correspondence and material  
758 requests should be addressed.

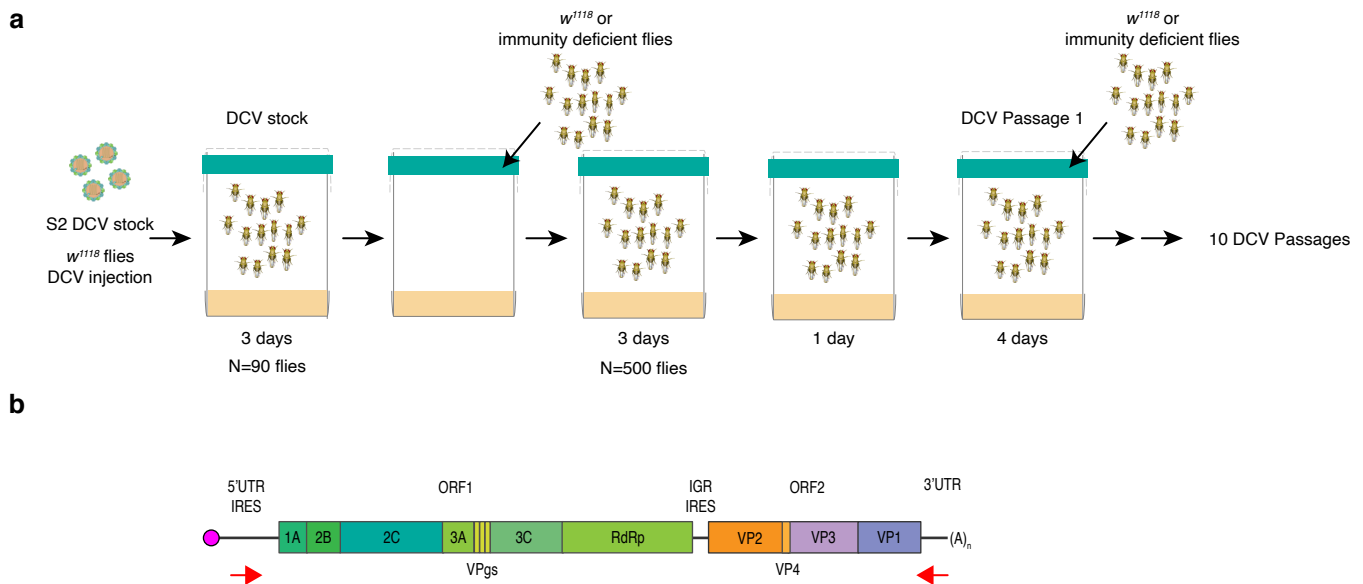

**Figure 1. Experimental design. a)** Scheme of the experimental DCV evolution assay. To produce the starting DCV stock (DCV stock) 5 to 6 days old  $w^{1118}$  were intrathoracically injected with 100 TCID<sub>50</sub> units of DCV from a stock produced in S2 drosophila cells (S2 DCV stock) or mock infected. At 4 dpi, N = 90 DCV infected flies were placed in cages containing fresh drosophila medium, left during 3 days and then removed to place in these DCV contaminated or mock contaminated cages N = 500 5 to 6 days old  $w^{1118}$  or mutant flies (males and females). Flies were allowed to feed *ad libitum* during 3 days (oral inoculation period), then moved to a clean cage for 1 day, and further placed into a new clean cage and left during 4 days, when they were harvested (DCV passage 1, P = 1). Contaminated cages were used to place a new group of 500 flies. This procedure was repeated 10 times (10 DCV passages, P = 1 to P = 10) and replicated twice (biological replicates BR1 and BR2). For each passage, and genotype, half of the harvested flies were used to PCR-amplify the complete DCV genome followed by deep-sequenced. The other half was used to produce viral stock for passages P = 1 and P = 10 from each genotype for phenotypic characterization. **b)** Scheme of DCV genome and the localization of primers used to amplify the complete viral genome. The viral genome is composed of single-stranded positive-sense RNA and encodes for two ORFs which are transcribed as polyproteins. The first ORF (ORF 1) encodes for the non-structural viral proteins, 1A: viral silencing suppressor, 2C: RNA helicase, VPg: viral genome-linked protein, 3C: protease, RdRp: RNA-dependent RNA polymerase, 2B and 3A: are thought to be involved in the assembly of the viral replication complex. The second ORF (ORF 2) encodes for DCV structural proteins VP1 to VP4 which constitute the viral capsid.

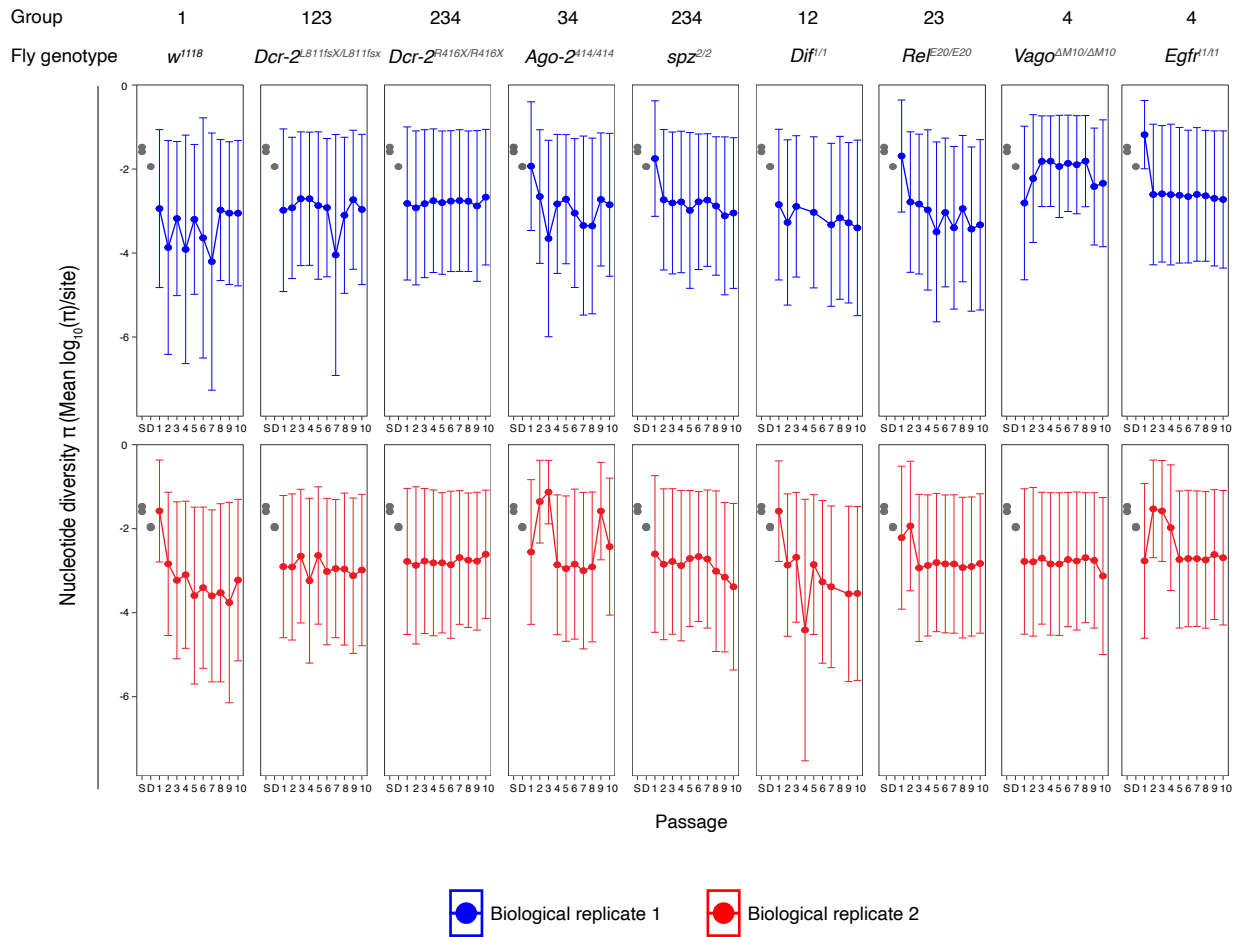

**Figure 2. Viral nucleotide diversity differently evolves in each host genotype.** Trajectory of the site-averaged nucleotide diversity ( $\pi$ ) on all polymorphic sites ( $n = 1869$ ) across the full-length viral genome, and in the different DCV genomic regions.

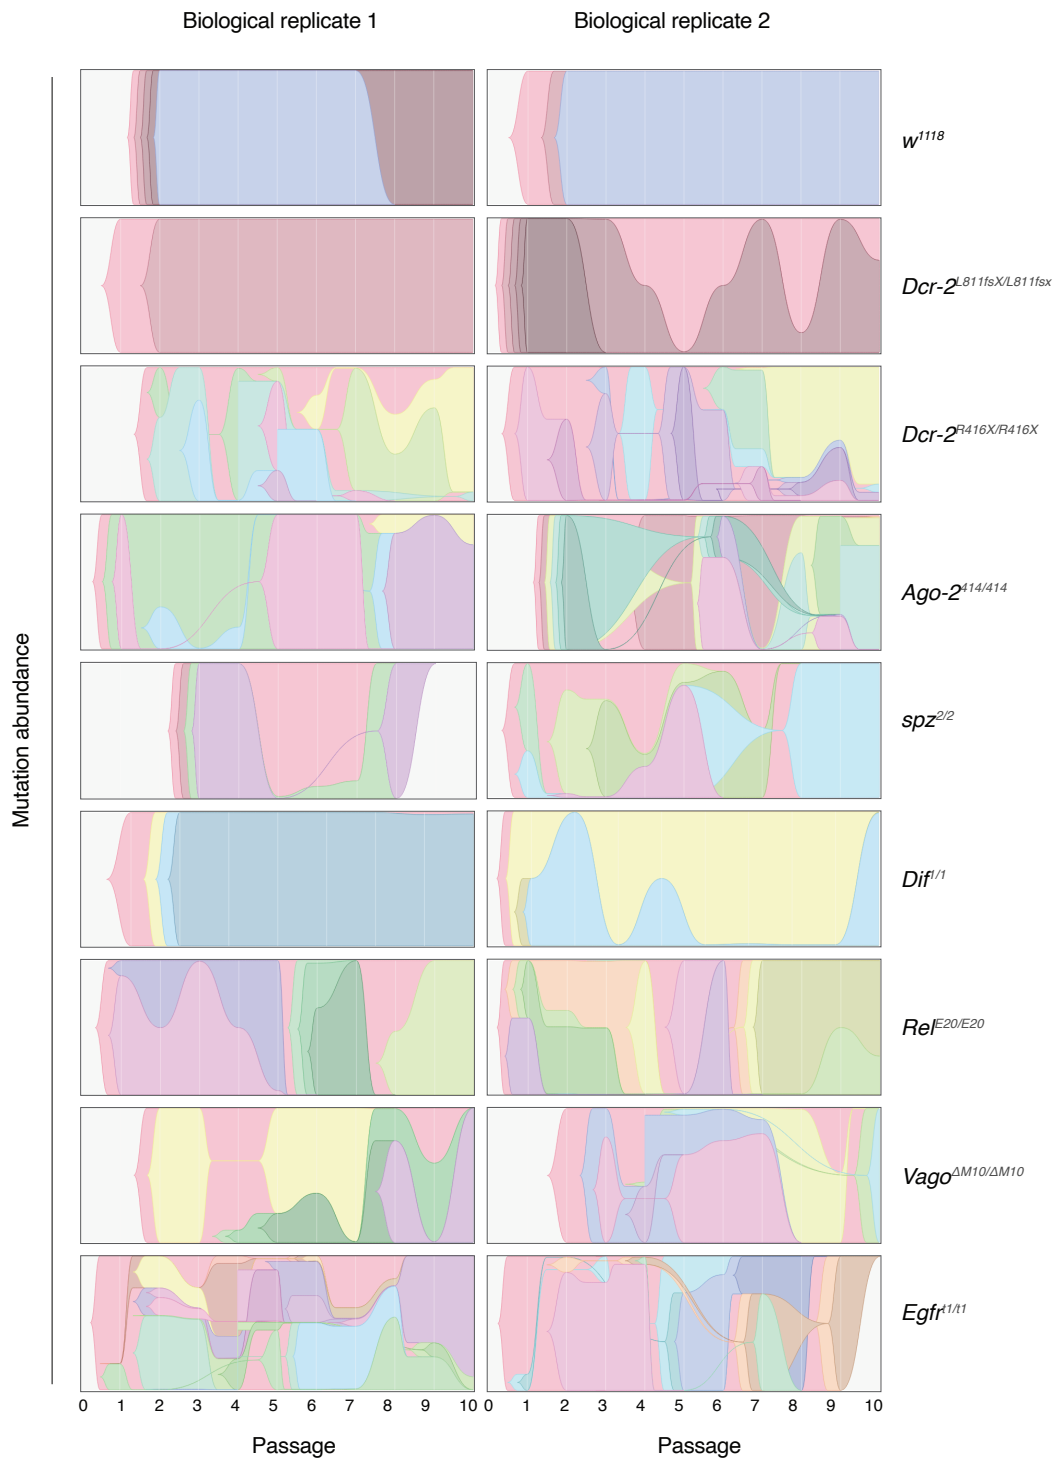

**Figure 3. Trajectories of DCV variants across passages.** Muller plots illustrating the dynamics of SNPs' frequencies along evolutionary time.

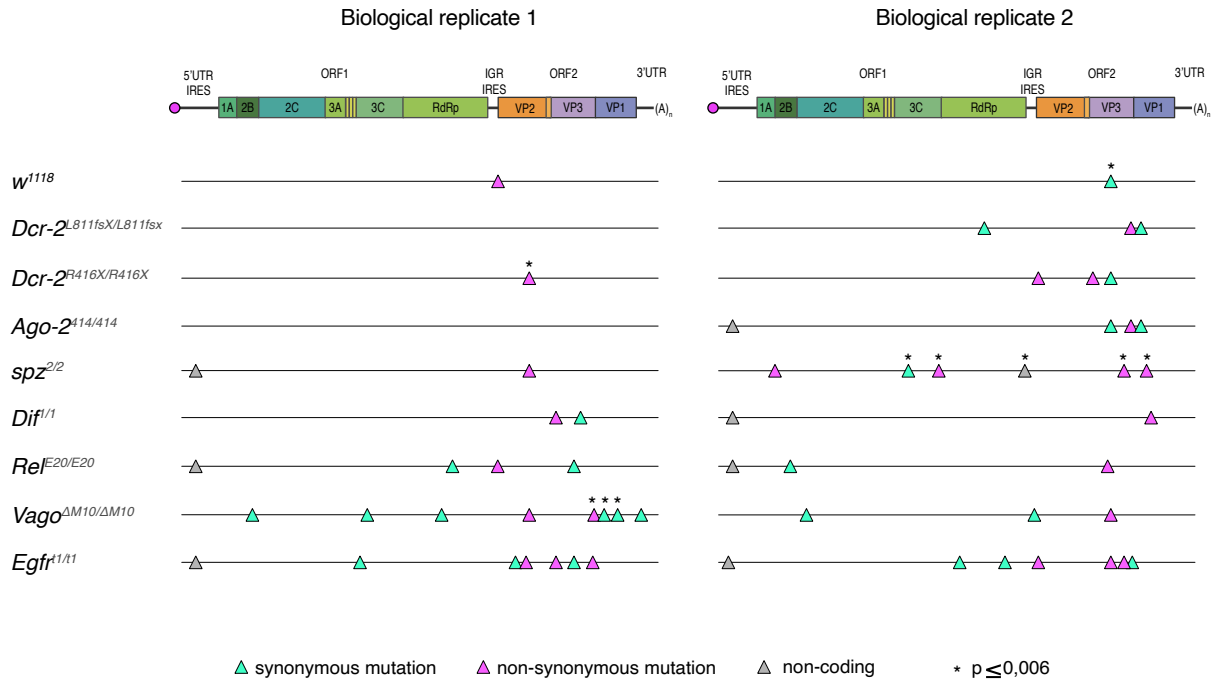

**Figure 4. SNPs for which significant estimates of fitness effects have been obtained mapped on the viral genome.** Green triangles represent synonymous mutations, pink triangles nonsynonymous mutations and gray triangles mutations in non-coding sequences. Cases significant after FDR correction are marked with an asterisk.

**a**

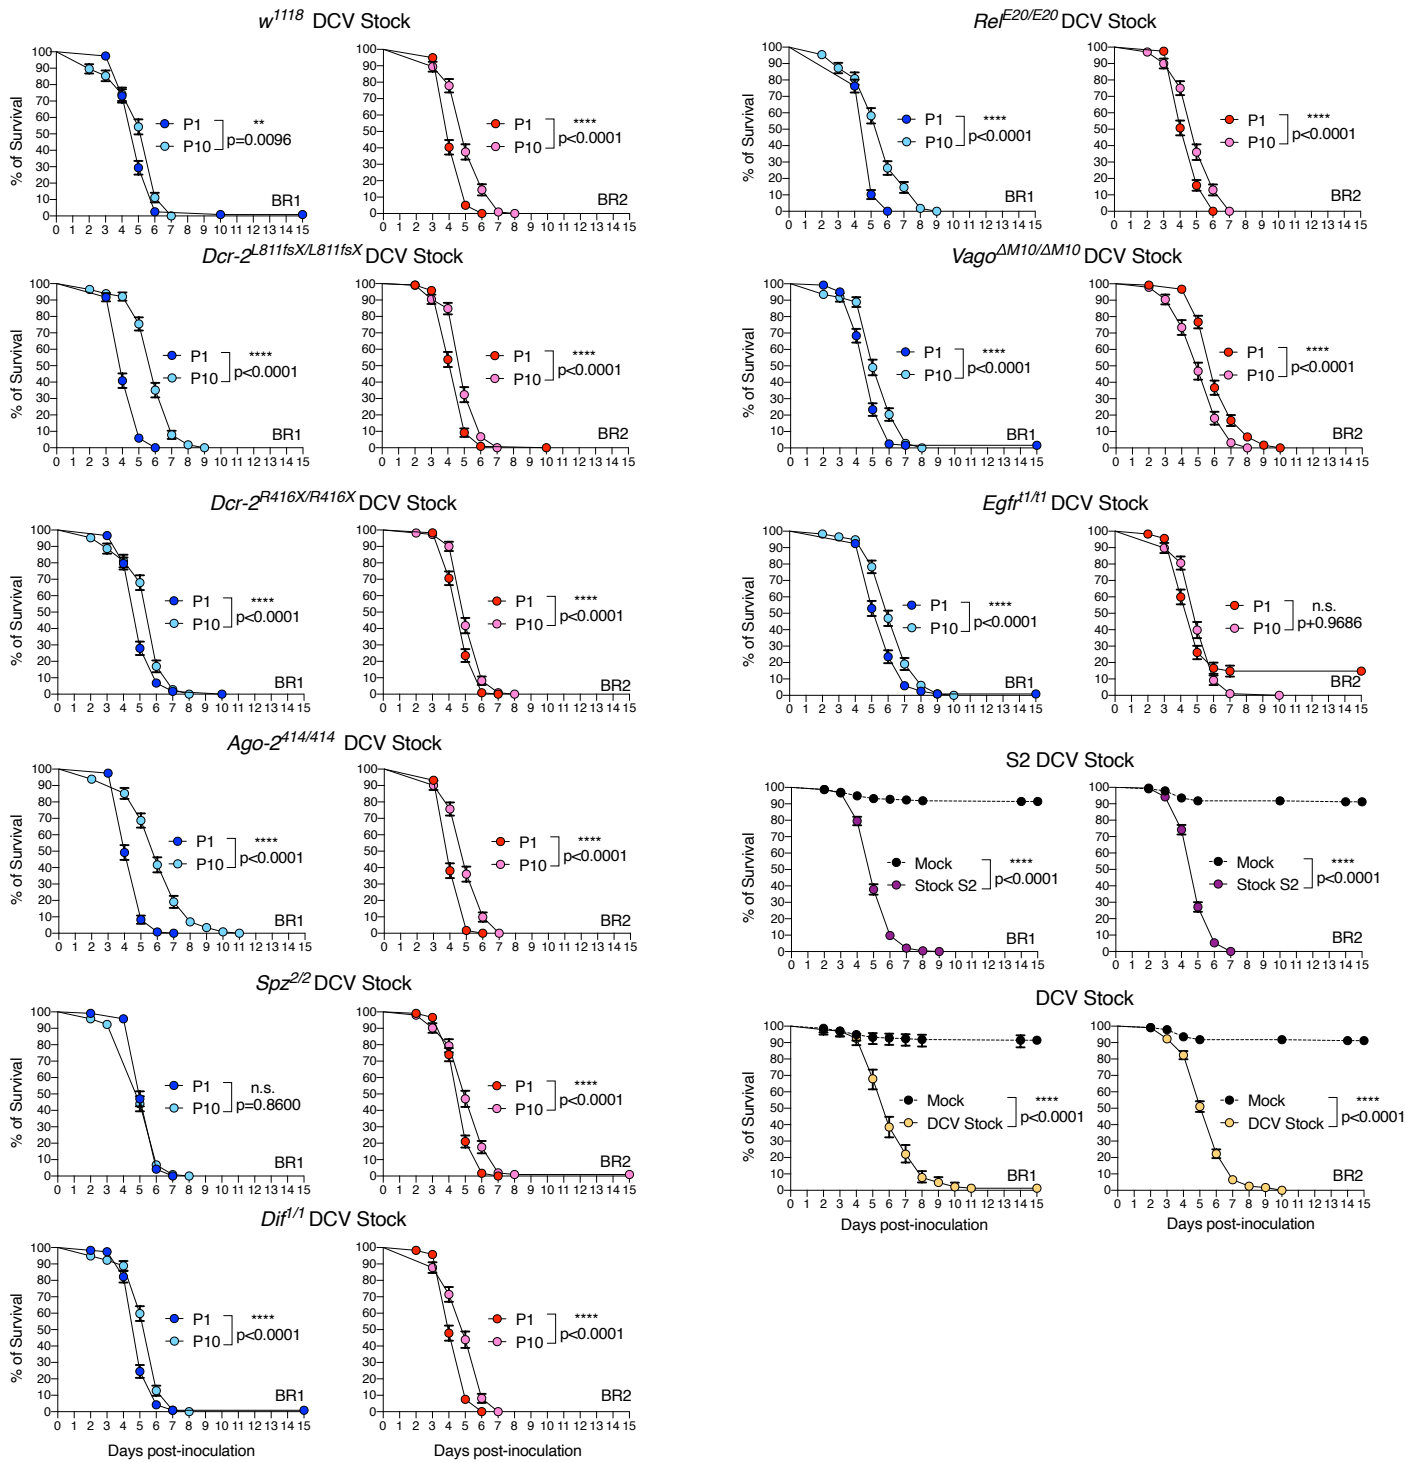

**b**

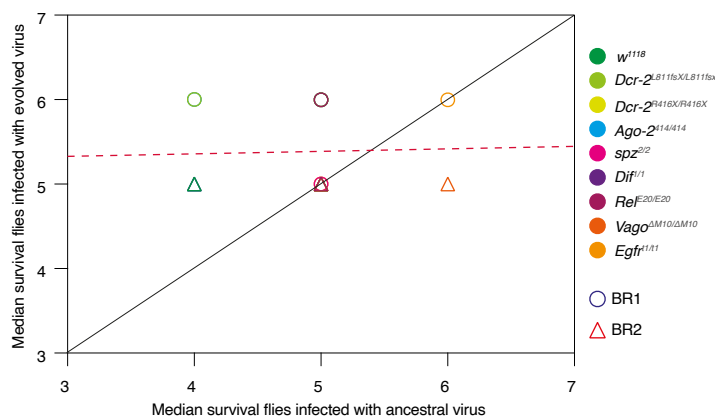



**Figure 5. DCV virulence is not affected by the absence of immune pathways.** DCV infectious stocks were prepared from viral passages P = 1 and P = 10 and from each fly genotype. *w<sup>1118</sup>* flies were intrathoracically inoculated with 10 TCID<sub>50</sub> units of each DCV stock and survival of the flies was measured daily. **a)** Survival curves shown in the figure are the combination of the two independent replicates, with three technical replicates each, of a total of at least N = 98 flies per treatment. Error bars indicate +/-1 SEM; n.s., not significant. Survival curves were compared via log-rank (Mantel–Cox) tests. **b)** Test of the contribution of historical contingency evolved (P = 10) vs ancestral (P = 1) DCV virulence. The black line represents the linear regression and the dashed red line represents the expected relationship under the null hypothesis of ancestral differences in DCV virulence which are maintained after evolution despite noise introduced by random events (mutation and drift).

**Table 1. Comparison of viral nucleotide diversities ( $\pi$ ) by Bonferroni *post hoc* test based on pairwise comparisons from Supplementary Table 1.**

|                                  | Mean Log <sub>10</sub> ( $\pi$ )<br>per site | SE       | <i>d.f.</i> | <i>asympt.LCL</i> | <i>asympt.UCL</i> | <i>Group</i> |     |
|----------------------------------|----------------------------------------------|----------|-------------|-------------------|-------------------|--------------|-----|
| <b>Fly genotype</b>              | <i>w</i> <sup>1118</sup>                     | 0.000513 | 0.000104    | Inf               | 0.000293          | 0.000898     | 1   |
|                                  | <i>Dif</i> <sup>Δ1</sup>                     | 0.000704 | 0.000155    | Inf               | 0.000383          | 0.001295     | 12  |
|                                  | <i>Dcr-2</i> <sup>L811fsX/L811fsX</sup>      | 0.001089 | 0.000220    | Inf               | 0.000622          | 0.001906     | 123 |
|                                  | <i>Rel</i> <sup>E20/20</sup>                 | 0.001424 | 0.000287    | Inf               | 0.000814          | 0.002493     | 23  |
|                                  | <i>spz</i> <sup>2/2</sup>                    | 0.001532 | 0.000309    | Inf               | 0.000876          | 0.002682     | 234 |
|                                  | <i>Dcr-2</i> <sup>R416X/R416X</sup>          | 0.001656 | 0.000334    | Inf               | 0.000946          | 0.002899     | 234 |
|                                  | <i>Ago-2</i> <sup>414/414</sup>              | 0.002332 | 0.000471    | Inf               | 0.001332          | 0.004081     | 34  |
|                                  | <i>Egfr</i> <sup>Δ1/Δ1</sup>                 | 0.003586 | 0.000724    | Inf               | 0.002049          | 0.006277     | 4   |
| <i>Vago</i> <sup>DM10/DM10</sup> | 0.003591                                     | 0.000725 | Inf         | 0.002052          | 0.006286          | 4            |     |
| <b>Genome region</b>             | 3'UTR                                        | 1.98e-05 | 2.44e-06    | Inf               | 1.46e-05          | 0.000027     | 1   |
|                                  | 5'UTR IRES                                   | 1.49e-04 | 1.25e-05    | Inf               | 1.21e-04          | 0.000184     | 2   |
|                                  | ORF1                                         | 4.42e-04 | 3.68e-05    | Inf               | 3.59e-04          | 0.000544     | 3   |
|                                  | ORF2                                         | 5.90e-04 | 4.91e-05    | Inf               | 4.79e-04          | 0.000726     | 3   |
| <b>Fly genotype – P5</b>         | <i>w</i> <sup>1118</sup>                     | 0.000405 | 0.000191    | 10                | 7.27e-05          | 0.00226      | 1   |
|                                  | <i>Rel</i> <sup>E20/20</sup>                 | 0.000712 | 0.000336    | 10                | 1.28e-04          | 0.00397      | 1   |
|                                  | <i>Dif</i> <sup>Δ1</sup>                     | 0.001149 | 0.000542    | 10                | 2.06e-04          | 0.00640      | 1   |
|                                  | <i>spz</i> <sup>2/2</sup>                    | 0.001432 | 0.000676    | 10                | 2.57e-04          | 0.00799      | 12  |
|                                  | <i>Ago-2</i> <sup>414/414</sup>              | 0.001476 | 0.000697    | 10                | 2.65e-04          | 0.00823      | 12  |
|                                  | <i>Dcr-2</i> <sup>R416X/R416X</sup>          | 0.001574 | 0.000743    | 10                | 2.82e-04          | 0.00878      | 12  |
|                                  | <i>Dcr-2</i> <sup>L811fsX/L811fsX</sup>      | 0.001776 | 0.000839    | 10                | 3.19e-04          | 0.00991      | 12  |
|                                  | <i>Egfr</i> <sup>Δ1/Δ1</sup>                 | 0.002112 | 0.000997    | 10                | 3.79e-04          | 0.01178      | 12  |
|                                  | <i>Vago</i> <sup>DM10/DM10</sup>             | 0.004101 | 0.001937    | 10                | 7.35e-04          | 0.02286      | 12  |
|                                  | S2 DCV stock R1                              | 0.029434 | 0.013900    | 10                | 5.28e-03          | 0.16412      | 2   |
| S2 DCV stock R2                  | 0.029717                                     | 0.014034 | 10          | 5.33e-03          | 0.16570           | 2            |     |
| <b>Fly genotype – P10</b>        | <i>Dif</i> <sup>Δ1</sup>                     | 0.000340 | 0.000136    | 10                | 7.95e-05          | 0.00146      | 1   |
|                                  | <i>spz</i> <sup>2/2</sup>                    | 0.000614 | 0.000245    | 10                | 1.44e-04          | 0.00263      | 1   |
|                                  | <i>w</i> <sup>1118</sup>                     | 0.000734 | 0.000293    | 10                | 1.72e-04          | 0.00314      | 1   |
|                                  | <i>Rel</i> <sup>E20/20</sup>                 | 0.000841 | 0.000336    | 10                | 1.97e-04          | 0.00360      | 1   |
|                                  | <i>Dcr-2</i> <sup>L811fsX/L811fsX</sup>      | 0.001072 | 0.000428    | 10                | 2.50e-04          | 0.00458      | 1   |
|                                  | <i>Vago</i> <sup>DM10/DM10</sup>             | 0.001861 | 0.000743    | 10                | 4.35e-04          | 0.00796      | 1   |
|                                  | <i>Egfr</i> <sup>Δ1/Δ1</sup>                 | 0.001972 | 0.000788    | 10                | 4.61e-04          | 0.00844      | 1   |
|                                  | <i>Dcr-2</i> <sup>R416X/R416X</sup>          | 0.002310 | 0.000923    | 10                | 5.40e-04          | 0.00988      | 12  |
|                                  | <i>Ago-2</i> <sup>414/414</sup>              | 0.002316 | 0.000925    | 10                | 5.41e-04          | 0.00991      | 12  |
|                                  | S2 DCV stock R1                              | 0.029434 | 0.011758    | 10                | 6.88e-03          | 0.12593      | 2   |
| S2 DCV stock R2                  | 0.029717                                     | 0.011871 | 10          | 6.95e-03          | 0.12714           | 2            |     |

SE: standard error, *asympt.LCL*: asymptomatic lower confidence level; *asympt.UCL*: asymptomatic upper confidence level

**Table 2. Analysis of the impact of each experimental variable on the evolution of viral nucleotide diversity ( $\pi$ ) considering the full-length viral genome and all viral passages.**

| Source of variation | LR $\chi^2$ | <i>d.f.</i> | Pr(> $\chi^2$ ) |
|---------------------|-------------|-------------|-----------------|
| BR                  | 2.2528      | 1           | 0.133372        |
| P                   | 1.6460      | 1           | 0.199498        |
| G                   | 25.5447     | 8           | 0.001256 **     |
| (BR)xP              | 0.0024      | 1           | 0.960572        |
| (BR)xG              | 14.2963     | 8           | 0.074361        |
| PxG                 | 12.1679     | 8           | 0.143867        |
| (BR)xPxG            | 10.4253     | 8           | 0.236435        |

BR: Biological replicate; P: viral passage; G: fly genotype

LR: likelihood ratio  $\chi^2$ ; Pr(>Chisq): p-value

**Table 3. Mutations for which significant estimates of fitness effects have been obtained.**

| Fly genotype                           | Biological replicate | Mutation              | Standing variation (frequency) | Selection coefficient per passage ( $\pm$ SEM) | <i>P</i>  |
|----------------------------------------|----------------------|-----------------------|--------------------------------|------------------------------------------------|-----------|
| <i>w<sup>1118</sup></i>                | 1                    | VP2/G6311C R16P       | Yes (0.0104)                   | 1.2039 $\pm$ 0.2543                            | 0.0418    |
| <i>w<sup>1118</sup></i>                | 2                    | VP3/U7824C            | Yes (0.1457)                   | 0.4780 $\pm$ 0.0617                            | < 0.0001* |
| <i>Dcr-2<sup>L811fsX/L811fsX</sup></i> | 1                    | -                     |                                |                                                |           |
| <i>Dcr-2<sup>L811fsX/L811fsX</sup></i> | 2                    | RpRd/U5302C           | No                             | 0.3877 $\pm$ 0.0973                            | 0.0073    |
|                                        |                      | VP1/C8227U H655Y      | Yes (0.0147)                   | 0.3735 $\pm$ 0.1368                            | 0.0258    |
|                                        |                      | VP1/C8424U            | Yes (0.0139)                   | 0.3880 $\pm$ 0.1407                            | 0.0248    |
| <i>Dcr-2<sup>R416X/R416X</sup></i>     | 1                    | VP2/C6932U A223V      | Yes (0.0084)                   | 0.2135 $\pm$ 0.0169                            | < 0.0001* |
| <i>Dcr-2<sup>R416X/R416X</sup></i>     | 2                    | VP2/G6379A A39T       | Yes (0.0098)                   | 0.2074 $\pm$ 0.0555                            | 0.0057    |
|                                        |                      | VP3/A7465G I401V      | Yes (0.0088)                   | 0.1185 $\pm$ 0.0338                            | 0.0100    |
|                                        |                      | VP3/U7824C            | Yes (0.1457)                   | -0.2887 $\pm$ 0.0884                           | 0.0309    |
| <i>Ago-2<sup>414/414</sup></i>         | 1                    | -                     |                                |                                                |           |
| <i>Ago-2<sup>414/414</sup></i>         | 2                    | 5'UTR/A280U           | Yes (0.1176)                   | -0.1307 $\pm$ 0.0376                           | 0.0084    |
|                                        |                      | VP3/U7824C            | Yes (0.1457)                   | 0.5251 $\pm$ 0.1050                            | 0.0024    |
|                                        |                      | VP1/C8227U H655Y      | Yes (0.0147)                   | 0.6238 $\pm$ 0.1077                            | 0.0007    |
|                                        |                      | VP1/C8424U            | Yes (0.0139)                   | 0.6206 $\pm$ 0.1252                            | 0.0026    |
| <i>Spz<sup>2/2</sup></i>               | 1                    | 5'UTR/A280U           | Yes (0.1176)                   | -0.2092 $\pm$ 0.0735                           | 0.0215    |
|                                        |                      | VP2/G6931A A223T      | No                             | 0.5420 $\pm$ 0.1477                            | 0.0105    |
| <i>Spz<sup>2/2</sup></i>               | 2                    | 2A/A1128C D110A       | Yes (0.0041)                   | -0.0229 $\pm$ 0.0065                           | 0.0246    |
|                                        |                      | 3C-Prot/A3787G        | No                             | 0.5238 $\pm$ 0.0757                            | 0.0002*   |
|                                        |                      | 3C-Prot/G4394A V1199I | No                             | 0.5982 $\pm$ 0.0764                            | 0.0002*   |
|                                        |                      | VP1/G8536A V758I      | No                             | 0.7038 $\pm$ 0.0915                            | 0.0006*   |
|                                        |                      | IGR/A6108G            | Yes (0.0044)                   | 0.4873 $\pm$ 0.0692                            | 0.0002*   |
|                                        |                      | VP3/G8090A R609H      | Yes (0.0200)                   | 0.4947 $\pm$ 0.0722                            | 0.0001*   |
| <i>Dif<sup>1/1</sup></i>               | 1                    | VP3/A7465G I401V      | Yes (0.0088)                   | 0.3213 $\pm$ 0.1173                            | 0.0338    |
|                                        |                      | VP3/G7956A            | No                             | 0.2000 $\pm$ 0.0335                            | 0.0094    |
| <i>Dif<sup>1/1</sup></i>               | 2                    | 5'UTR/A280U           | Yes (0.1176)                   | 0.5157 $\pm$ 0.1289                            | 0.0052    |
|                                        |                      | VP1/U8629C S5058P     | Yes (0.0898)                   | 0.4864 $\pm$ 0.1175                            | 0.0043    |
| <i>Rel<sup>E20/E20</sup></i>           | 1                    | 5'UTR/A280U           | Yes (0.1176)                   | 0.3430 $\pm$ 0.1017                            | 0.0097    |
|                                        |                      | RdRp/A5404G           | Yes (0.0929)                   | 0.3993 $\pm$ 0.1217                            | 0.0135    |
|                                        |                      | VP2/U6303A N13K       | Yes (0.0037)                   | 0.5724 $\pm$ 0.1409                            | 0.0036    |
|                                        |                      | VP3/U7824C            | Yes (0.1457)                   | -0.2804 $\pm$ 0.0206                           | 0.0467    |
| <i>Rel<sup>E20/E20</sup></i>           | 2                    | 5'UTR/A280U           | Yes (0.1176)                   | -0.0917 $\pm$ 0.0277                           | 0.0130    |
|                                        |                      | 2B/C1412U             | Yes (0.1301)                   | 0.4554 $\pm$ 0.0119                            | 0.0166    |
|                                        |                      | VP3/C7760A T499N      | No                             | 0.1340 $\pm$ 0.0195                            | 0.0005    |
| <i>Vago<sup>AM10/AM10</sup></i>        | 1                    | 2B/C1412U             | Yes (0.1301)                   | 0.2386 $\pm$ 0.0549                            | 0.0025    |
|                                        |                      | 3C-Prot/A3703G        | No                             | 0.2859 $\pm$ 0.0537                            | 0.0031    |
|                                        |                      | RdRp/U5188A           | Yes (0.1325)                   | 0.2869 $\pm$ 0.0705                            | 0.0268    |
|                                        |                      | VP2/C6932U A223V      | Yes (0.0084)                   | 0.1368 $\pm$ 0.0553                            | 0.0426    |
|                                        |                      | VP1/C8227U H655Y      | Yes (0.0147)                   | 0.1936 $\pm$ 0.0291                            | 0.0002*   |
|                                        |                      | VP1/C8424U            | Yes (0.0139)                   | 0.1915 $\pm$ 0.0283                            | 0.0001*   |
|                                        |                      | VP1/U8697C            | No                             | 0.2053 $\pm$ 0.0325                            | 0.0002*   |
|                                        |                      | 3'UTR/U9163A          | No                             | 0.1473 $\pm$ 0.0622                            | 0.0497    |
| <i>Vago<sup>AM10/AM10</sup></i>        | 2                    | 2C-Hel/G1756A         | Yes (0.0059)                   | 0.3467 $\pm$ 0.1293                            | 0.0364    |
|                                        |                      | VP2/A6300U E12D       | No                             | 0.3681 $\pm$ 0.1297                            | 0.0470    |
|                                        |                      | VP3/U7824C            | Yes (0.1372)                   | 0.1517 $\pm$ 0.0391                            | 0.0060    |
| <i>Egfr<sup>1/1</sup></i>              | 1                    | 5'UTR/A280U           | Yes (0.1176)                   | 0.1394 $\pm$ 0.0364                            | 0.0050    |

|                           |   |                   |              |                  |        |
|---------------------------|---|-------------------|--------------|------------------|--------|
| <i>Egfr<sup>+/+</sup></i> | 2 | 3C-Prot/U3643A    | No           | -0.2064 ± 0.0592 | 0.0399 |
|                           |   | VP1/A8201G Q646R  | Yes (0.0045) | 0.3198 ± 0.0736  | 0.0225 |
|                           |   | VP2/A6660U        | No           | -0.1906 ± 0.0641 | 0.0409 |
|                           |   | VP2/G6868A V8162I | No           | 0.3302 ± 0.0389  | 0.0001 |
|                           |   | VP3/A7465G I401V  | Yes (0.0088) | -0.1053 ± 0.0359 | 0.0261 |
|                           |   | VP3/U7824C        | Yes (0.1457) | 0.0997 ± 0.0410  | 0.0411 |
|                           |   | 5'UTR/A198G       | No           | 0.1035 ± 0.0363  | 0.0246 |
|                           |   | RdRp/U4810C       | Yes (0.1152) | -0.2635 ± 0.0301 | 0.0128 |
|                           |   | RdRp/C5713U       | Yes (0.1148) | -0.3036 ± 0.0276 | 0.0082 |
|                           |   | VP2/G6379A A39T   | Yes (0.0082) | 0.0630 ± 0.0254  | 0.0381 |
|                           |   | VP3/U7824C        | Yes (0.1457) | -0.1090 ± 0.0402 | 0.0421 |
|                           |   | VP3/G8090A R609H  | Yes (0.0200) | 0.0764 ± 0.0289  | 0.0333 |
|                           |   | VP1/U8250G H662Q  | Yes (0.0201) | 0.1734 ± 0.0326  | 0.0060 |

For each mutation, we indicate whether it already existed in the DCV starting stocks (and at which frequency) or arose during the evolution experiment. We also provide the estimated selection coefficient, its SEM and statistical significance. Cases significant after FDR correction are marked with an asterisk.
